1 **Ecology drives diversification of reproductive strategies in viviparous**  
2 **fishes**

3

4 Michael Tobler<sup>1\*</sup> & Zachary Culumber<sup>2</sup>

5

6 <sup>1</sup>Division of Biology, Kansas State University, Manhattan, KS 66506, USA

7 <sup>2</sup>Department of Biological Sciences, University of Alabama in Huntsville, Huntsville, AL 35899,

8 USA

9

10 \*Corresponding author: Michael Tobler, Division of Biology, Kansas State University, 106 Ackert

11 Hall, Manhattan, KS, USA; email: [tobler@ksu.edu](mailto:tobler@ksu.edu)

12

13 *Running Title:* Life history diversification of livebearing fishes

14

15 *Keywords:* life history evolution | natural selection | phylogenetic comparative analysis | Poeciliidae |

16 sexual selection

17

18 **Abstract**

19 Major shifts in life history evolution often coincide with other evolutionary phenomena, such as  
20 changes in sexual selection, parent-offspring conflict, and speciation. However, we rarely understand  
21 the causative links between correlated patterns of diversification or the tipping points that initiate  
22 changes with cascading effects. We investigated livebearing fishes with repeated transitions from  
23 pre- to post-fertilization maternal provisioning and correlated mating system evolution to identify  
24 the order of evolutionary shifts and the ultimate drivers of initial evolutionary transitions.  
25 Comparative analyses of temporal dynamics across 94 species revealed that repeated shifts from  
26 lecithotrophy (pre-fertilization provisioning) to matrotrophy (post-fertilization provisioning)  
27 preceded concomitant changes in sexual selection, establishing a previously missing causal link in the  
28 correlated evolution of these traits. In addition, we show that bi-directional evolution along the  
29 lecithotrophy-matrotrophy continuum is correlated with ecology, supporting adaptive hypotheses of  
30 life history diversification. Consistent with theoretical models, matrotrophy was associated with high  
31 resource availability and low competition. Our results indicate that geographic variation in ecological  
32 conditions is the underlying force that promotes an evolutionary cascade in life history, sexual  
33 selection, and potentially speciation.

34

## 35 **Introduction**

36 Evolutionary transitions in maternal provisioning strategies represent a primary axis of reproductive  
37 life history variation in viviparous organisms (Wourms 1981; Blackburn 1992). Shifts from an  
38 ancestral strategy of females providing all resources for embryonic development prior to fertilization  
39 (lecithotrophy) to post-fertilization provisioning (matrotrophy) have been associated with the  
40 evolution of complex physiological and morphological adaptations, including placental structures of  
41 apposed maternal and embryonic tissues that facilitate nutrient transfer (Wooding & Burton 2008).  
42 Matrotrophy and placentas have evolved repeatedly in viviparous animals, including multiple  
43 invertebrate (Campiglia & Walker 1995; Hart *et al.* 1997; Korniuschin & Glaubrecht 2003; Korneva  
44 2005; Ostrovsky *et al.* 2016) and vertebrate lineages (Steward & Blackburn 1988; Wourms *et al.* 1988;  
45 Wake & Dickie 1998; Wildman *et al.* 2006). Transitions along the lecithotrophy-matrotrophy  
46 continuum may have far reaching consequences, shaping the evolution of other traits and patterns  
47 of biological diversification (Zeh & Zeh 2000; Coleman *et al.* 2009; Pollux *et al.* 2014; Furness *et al.*  
48 2015). What evolutionary forces shape the evolution of matrotrophy, however, remains unclear  
49 (Pollux *et al.* 2009).

50         As for other patterns of evolutionary diversification, a pivotal question in understanding  
51 transitions from lecithotrophy to matrotrophy is what roles natural and sexual selection play during  
52 evolution (Rundle *et al.* 2009; Salzburger 2009; Maan & Seehausen 2011). Disentangling the effects  
53 of natural and sexual selection can be particularly challenging when there are interactive effects,  
54 where transitions in naturally selected traits potentiate (or impede) changes in sexual selection or vice  
55 versa (Lorch *et al.* 2003; Candolin & Heuscheke 2008; Chenoweth *et al.* 2015; Parrett & Knell 2018).  
56 Such interactive effects can lead to the correlated evolution of naturally and sexually selected traits,  
57 as previously documented for the degree of post-fertilization maternal provisioning and mating  
58 systems (Pollux *et al.* 2014). Interactions between natural and sexual selection in the context of

59 matrotrophy evolution could go either way. On one hand, evolution along a continuum of mating  
60 systems ranging from those characterized by male coercion and post-copulatory female choice to  
61 those exhibiting male courtship and pre-copulatory female choice may potentiate diversification in  
62 life history strategies (Long 2005; Haig 2014). Females of species exhibiting high rates of male  
63 coercion should be selected for reduced pre-fertilization provisioning to avoid costs associated with  
64 genetically incompatible sires (Long 2005; Haig 2014). On the other hand, evolutionary change in  
65 maternal provisioning strategies may affect patterns of sexual selection, because the emergence of  
66 matrotrophy can potentiate post-copulatory mate choice by females and weaken the importance of  
67 pre-copulatory sexual selection and male courtship (Pollux *et al.* 2014). These alternative hypotheses  
68 not only raise questions about the order of evolutionary transitions, but also about what forces  
69 initiate major evolutionary changes that then have cascading effects during diversification.

70 We used livebearing fishes of the family Poeciliidae to elucidate the causal direction of  
71 evolutionary shifts in sexual selection and life histories and to identify potential ecological tipping  
72 points for diversification. Livebearing fishes are an iconic model system for testing hypotheses about  
73 the evolution of reproductive strategies at micro- and macroevolutionary scales (Evans *et al.* 2011).  
74 Poeciliids have undergone remarkable diversification in levels of post-fertilization maternal  
75 provisioning (with independent origins of matrotrophy in different clades; Reznick *et al.* 2002; Pollux  
76 *et al.* 2009; Pollux *et al.* 2014), as well as male mating strategies and sexual selection (ranging from  
77 mating systems dominated by male coercion to systems dominated by pre-copulatory female mate  
78 choice; Bisazza *et al.* 1997; Pollux *et al.* 2014; Culumber & Tobler 2017). In addition, species in this  
79 family are broadly distributed throughout the Americas, found in a wide variety of ecological  
80 contexts, and have a well-resolved phylogeny (Meffe & Snelson 1989; Hrbek *et al.* 2007; Reznick *et*  
81 *al.* 2017), facilitating comparative analyses that contrast hypotheses about the evolutionary origins of  
82 matrotrophy. Research on poeciliid fishes has been instrumental for the advancement of our

83 theoretical and empirical understanding of matrotrophy (Thibault & Schultz 1978; Pollux *et al.* 2009;  
84 Pires *et al.* 2011) as well as sexual selection and mate choice (Endler 1983; Meyer *et al.* 1994; Ryan  
85 1998). In addition, previous analyses have documented correlated evolution between maternal  
86 provisioning strategies and sexual selection (Pollux *et al.* 2014; Figure 1A).

87 Using phylogenetic comparative analyses of 94 species spanning the family Poeciliidae, we  
88 first show that evolutionary shifts in maternal provisioning strategies predate shifts in sexual  
89 selection, establishing a previously untested causative relationship (Haig 2014; Pollux *et al.* 2014). We  
90 then characterize the evolutionary dynamics of matrotrophy evolution and show that variation along  
91 the lecithotrophy-matrotrophy continuum is correlated with ecological variables associated with  
92 resource availability and competition, as predicted by theoretical models (Trexler & DeAngelis  
93 2003).

94

## 95 **Methods**

### 96 ***Taxon sampling and phylogenetic framework***

97 Our analyses included 94 species (Table S1), encompassing representatives of all major genera in the  
98 family Poeciliidae. These species span a geographic range from the eastern United States south to  
99 Argentina, including Caribbean islands (Figure S1). The phylogenetic framework used for analyses  
100 was established by previous studies with similar taxon sampling (Pollux *et al.* 2014; Culumber &  
101 Tobler 2017). In brief, sequences for six mitochondrial (*12S*, *COI*, *CytB*, *ND2*, *tRNA<sup>Valu</sup>*, and  
102 *tRNA<sup>Leu</sup>*) and 11 nuclear genes (*Beta Actin*, *CCND1*, *ENC1*, *GLYT*, *MYH6*, *RAG1*, *Rhodopsin*, *RPS7*,  
103 *SH3PX3*, *T36*, and *XSRC*) were obtained from GenBank, aligned, and maximum likelihood  
104 phylogenetic analysis was conducted using RAxML-HPC version 8 (Stamatakis 2014) on the  
105 CIPRES computer cluster (San Diego State University, San Diego, CA, USA). The resulting best  
106 scoring tree was highly consistent with previously published phylogenetic hypotheses for the family

107 Poeciliidae (Hrbek *et al.* 2007; Pollux *et al.* 2014; Reznick *et al.* 2017). Phylogenetic trees were time  
108 calibrated with three calibration points spanning the depth of the phylogeny (see Culumber &  
109 Tobler 2017 for details), including a primary fossil calibration associated with the split separating the  
110 outgroup (*Fundulus*) from all poeciliids (55-99 Ma; Santini *et al.* 2009) and a secondary fossil  
111 calibration separating *Heterandria formosa* from the genus *Poecilia* (9.3-19 Ma; Ho *et al.* 2016). In  
112 addition, the formation of Laguna de Catemaco (Mexico), a crater lake with several endemic species,  
113 was used as a constraint on the age of the endemic *Poeciliopsis catemaco* (0.5-2.0 Ma; Mateos *et al.*  
114 2002). Even though bootstrap support values of the best scoring tree were generally strong,  
115 phylogenetic comparative methods described below were conducted across 250 trees drawn at  
116 random from the bootstrap replicates to account for phylogenetic uncertainty.

117

### 118 ***Quantifying matrotrophy and sexual selection***

119 The extent of post-fertilization maternal provisioning was quantified using the matrotrophy index  
120 (MI, ln-transformed for all analyses), which is the ratio of offspring mass at birth to the mass of the  
121 egg at fertilization (Reznick *et al.* 2002; Pollux *et al.* 2009). Offspring of lecithotrophic species  
122 typically lose 25-55% of the initial egg mass during development (MI < 0.75), while continuous  
123 nutrient transfer from mother to offspring during gestation in matrotrophic species leads to MI > 1  
124 (Reznick *et al.* 2002; Pollux *et al.* 2009). Matrotrophy levels for all species included in the analysis  
125 were obtained from previously published studies (Pollux *et al.* 2014; Olivera-Tlahuel *et al.* 2015).

126 Variation in sexual selection within poeciliids was quantified using a morphology-based  
127 sexual selection index (SSI), which quantifies the degree of sexual dimorphism in body shape and  
128 multiple fin traits that reflect variation in female choice and male mating strategies (Culumber &  
129 Tobler 2017). The index describes variation along a previously established continuum of poeciliid  
130 mating systems (Bisazza *et al.* 1997; Greven 2005; Martin *et al.* 2010), ranging from species

131 characterized by long gonopodia and coercive mating tactics (negative index scores) to species with  
132 short gonopodia and courtship (positive index scores; Culumber & Tobler 2017).

133

### 134 ***Evolutionary time-lag analysis of sexual selection and matrotrophy***

135 A prior study documented correlated evolution of matrotrophy and sexual selection in poeciliid  
136 fishes (Pollux *et al.* 2014; see Figure 1A), but the causal relationship was not resolved. Three  
137 hypotheses could explain correlated evolution: (1) Evolution in patterns of sexual selection along a  
138 continuum from male coercion with cryptic female choice to male courtship with pre-copulatory  
139 female choice may favor different maternal provisioning strategies and impact parent-offspring  
140 conflict (Ala-Honkola *et al.* 2011; Haig 2014); (2) shifts along the lecithotrophy-matrotrophy  
141 continuum may drive the evolution of sexual selection (Zeh & Zeh 2000; Pollux *et al.* 2014); or (3)  
142 the same (or correlated) environmental factors may exert selection on multiple traits, causing  
143 correlated phenotypic evolution without pleiotropic interactions among trait suites.

144 We used the MVMORPH package in R (Clavel *et al.* 2015) to evaluate the causal relationship  
145 underlying the previously documented correlated evolution of matrotrophy and sexual selection.  
146 MVMORPH implements Ornstein-Uhlenbeck models to test whether one trait follows the optimum  
147 of a second trait with a detectable time-lag. We used the matrotrophy index and the sexual selection  
148 index as focal traits, contrasting a null model (no detectable lag) to a model that assumes shifts in  
149 matrotrophy lag behind shifts in sexual selection (i.e., sexual selection drives matrotrophy evolution)  
150 and a model that assumes shifts in sexual selection lag behind shifts in matrotrophy (i.e.,  
151 matrotrophy drives evolution of sexual selection; see Figure 1B). Analyses assuming a unique  
152 adaptive optimum (OU1 model) yielded identical results to assuming multiple optima (OUM  
153 model). Models were compared based on their average Akaike weights calculated with a finite  
154 sample correction (Johnson & Omland 2004).

155

156 ***Evolutionary dynamics of maternal provisioning strategies***

157 To characterize the evolutionary dynamics of matrotrophy evolution, we conducted ancestral state  
158 reconstructions of MI using PHYTOOLS (Revell 2012). To evaluate the directionality of matrotrophy  
159 evolution (increased *vs.* decreases in MI) between each node and its descendants, we extracted trait  
160 reconstructions for each node of the tree and calculated  $\Delta$ MI as the observed (tip) or inferred (node)  
161 matrotrophy values subtracted from the values of its most recent ancestral node.

162

163 ***Identifying ecological correlates of variation in maternal provision strategies***

164 There are two primary ecological hypotheses for the evolution of matrotrophy (Pollux *et al.* 2009;  
165 Pires *et al.* 2011): (1) Matrotrophy has been hypothesized to reduce locomotor costs associated with  
166 pregnancy (locomotor hypothesis; Magnhagen 1991; Shaffer & Formanowicz 1996; Miles *et al.*  
167 2000). Lecithotrophic females are expected to suffer from impaired locomotion throughout  
168 gestation, while matrotrophic females with initially small embryos should avoid such costs at least in  
169 early stages of pregnancy (Miller 1975; Thibault & Schultz 1978). Hence, matrotrophy should be  
170 associated with environments that favor high locomotor performance, such as habitats with high  
171 predation pressure or fast water currents (Reznick *et al.* 2007; Gorini-Pacheco *et al.* 2017). (2)  
172 Resource availability may shape evolution along the lecithotrophy-matrotrophy continuum.  
173 Lecithotrophy is expected to be adaptive in environments with low or fluctuating resource  
174 availability (Thibault & Schultz 1978), whereas matrotrophy theoretically maximizes reproductive  
175 output when resource availability is high and stable (Trexler & DeAngelis 2003).

176 To test these alternative hypotheses, we assembled a set of relevant environmental predictor  
177 variables. For the locomotor hypotheses, predictor variables included metrics of hydrology (based  
178 on the topography of each species' range) and predation (number of predatory fish species



179 overlapping each species' range). For the resource availability hypothesis, we quantified climate  
180 (temperature and precipitation patterns in each species' range, which are indicative of temporal  
181 variability), average net primary productivity (NPP), and competition (number of poeciliid species  
182 overlapping each species' range). The potential effects of different environmental variables on  
183 variation in maternal provisioning strategies was evaluated with phylogenetic path analysis as  
184 outlined below.

185 *Quantifying hydrology, climate, and net primary productivity:* Assembly of hydrological and climate  
186 variables associated with each species' range was based on georeferenced occurrence points. We  
187 obtained 73,398 locality points from multiple sources (<http://fishnet2.net/>, <http://gbif.org/>,  
188 primary literature), representing the known distributions for all 94 species included in our study. We  
189 first removed duplicate points and retained a maximum of 100 randomly sampled localities within  
190 the native range of each species, which is sufficient to capture environmental variation even in wide-  
191 ranging species (van Proosdij *et al.* 2015). We further verified that all data points for a given species  
192 were at least 1 km apart to match the spatial resolution of environmental data. Any locality that did  
193 not meet this criterion was either removed for species with <100 localities or replaced by another  
194 randomly drawn locality for species with >100 localities. For all locality records, we then extracted  
195 values for three hydrological (elevation, slope and compound topographic index; Hydro1k:  
196 <https://lta.cr.usgs.gov/HYDRO1K/>), 19 climatic variables (Worldclim: <http://worldclim.org/>), and  
197 an estimate of net primary productivity (<https://lpdaac.usgs.gov/>) at a spatial resolution of ~1 km<sup>2</sup>  
198 (30 arcsec) in ArcMap version 10.2.2 (ESRI Inc, Redlands, CA, USA). For each species, we  
199 calculated the median value for all 23 variables. Climatic and hydrological variables were then  
200 subjected to separate phylogenetic principal component analyses (pPCA) using a correlation matrix,  
201 as implemented in the PHYTOOLS package in R (Revell 2012). In addition to the estimate of net  
202 primary productivity associated with each species' range, we retained two pPCA axes accounting for

203 76% of variation in hydrology (Table S2) and three pPCA axes accounting for 81% of variation in  
204 climate (Table S3).

205 *Quantifying competition and predation:* Quantifying the actual biotic interactions for a large  
206 number of species distributed across the vast geographic scale included in this study is virtually  
207 impossible, such that we developed two simple, objectively quantifiable metrics to approximate  
208 levels of competition and predation. We assumed that competitive interactions for the focal species  
209 primarily occur with other species of the family Poeciliidae (Alberici da Barbiano *et al.* 2010; Torres-  
210 Dowdall *et al.* 2013) and that the intensity of competition is a function of the number of coexisting  
211 species. Hence, we first analyzed overlap of distributional ranges to characterize patterns of  
212 sympatry (defined as range overlap values greater than zero; Weber *et al.* 2016). We created geo-  
213 referenced distributional range maps for each species by generating a convex hull around each  
214 species' known occurrence points (see above) using ArcMap. The resulting species-specific  
215 distributions were then intersected to determine the total number of competitor species exhibiting a  
216 range overlap with a focal species. Similarly, we created a metric estimating the levels of predation by  
217 determining the total number of piscivorous fish species exhibiting a range overlap with each focal  
218 species. To do so, we obtained 271,148 locality points (<http://gbif.org/>) of 7,170 species across  
219 1,602 genera and 26 families in the superclass Osteichthyes that coincide with the distribution of  
220 poeciliids. Since distributional polygons of some focal species overlapped with marine habitats  
221 (particularly in poeciliid species occurring along the Gulf of Mexico and in both island and mainland  
222 localities), we first removed species primarily inhabiting marine environments as well as non-native  
223 species, retaining 5,019 native freshwater species in 853 genera (Table S4). To identify potential  
224 predators, we conducted a genus-level literature search of dietary habits using relevant monographs  
225 (Greenfield & Thomerson 1997; Bussing 1998; Boschung *et al.* 2004; Miller *et al.* 2005; van der Sleen  
226 & Albert 2017), supplemented by the primary literature when necessary. We retained 131 genera that

227 included species with evidence for piscivory (867 species; 73,421 locality points). Values for the  
228 number of competitors and predators were square-root-transformed prior to analyses.

229 *Analytical framework:* We investigated hypotheses about the hierarchical relationships among  
230 abiotic and biotic environmental factors and matrotrophy using phylogenetic path analysis as  
231 implemented in the R package PHYLOPATH (van der Bijl 2018). We developed 18 models based on *a*  
232 *priori* hypotheses about the effects of hydrology, climate, NPP, competition, predation, and  
233 interactions between predictor variables relevant in the context of the locomotor cost and resource  
234 limitation hypotheses of matrotrophy evolution (Figure S2). As with all other phylogenetic analyses  
235 described above, path analyses were run across 250 random trees. PHYLOPATH implements model  
236 selection with covariance inflation criterion,  $CIC_c$  (Rodriguez 2005). Models with an average  $\Delta CIC_c$   
237  $< 2$  were considered equally supported (Burnham & Anderson 2002). Joint effects of net primary  
238 productivity and competition were visualized using non-parametric thin-plate spline regression to  
239 create a surface of matrotrophy variation (Arnold 2003). Estimation of matrotrophy surfaces was  
240 performed using the FIELDS package in R, with smoothing parameter  $\lambda = 0.005$  (Nychka *et al.* 2007).

241

## 242 **Results**

### 243 ***Shifts in matrotrophy preceded shifts in sexual selection***

244 Analyses of evolutionary time-lags across 250 trees revealed the strongest support for the model in  
245 which shifts in matrotrophy preceded shifts in sexual selection (mean Akaike weight: 0.430; 95% CI:  
246 0.411 – 0.450). The null model (no lag between the two traits) received significantly lower support  
247 (mean Akaike weight: 0.312; 95% CI: 0.304 – 0.320), and the model assuming that shifts in sexual  
248 selection preceded shifts in matrotrophy had the lowest support (mean Akaike weight: 0.258; 95%  
249 CI: 0.244 – 0.272). These results support the previously held assumption that evolution in

250 matrotrophy mediates subsequent changes in sexual selection, rejecting the alternative hypothesis  
251 that sexual selection was a key driver of life history diversification in poeciliid fishes.

252

### 253 ***Evolutionary dynamics of matrotrophy evolution during diversification of poeciliid fishes***

254 Ancestral state reconstructions (ASR) were used to compare inferred ancestral states of matrotrophy  
255 to variation in matrotrophy observed in extant taxa (Figure 2A). ASRs across 250 trees  
256 demonstrated that lecithotrophy is not the ancestral provisioning strategy (Figure 2B), challenging  
257 previous assumptions about matrotrophy evolution in poeciliids. The inferred ancestral state was  
258 clearly toward the matrotrophic end of the spectrum (with a net weight gain during development)  
259 and distinctly above the levels of post-fertilization provisioning observed in most extant taxa (Figure  
260 2B). This does not mean that matrotrophy evolved prior to lecithotrophy, but rather that the  
261 common ancestor of extant poeciliids had already evolved some degree of post-fertilization  
262 provisioning. Examining the direction of shifts in post-fertilization provisioning strategies between  
263 all nodes and their descendants revealed that reductions of post-fertilization provisioning were just  
264 as common as increases in matrotrophy (Figure 2C).

265

### 266 ***Ecological correlates of matrotrophy evolution***

267 We contrasted a series of hypotheses about the hierarchical relationships among different abiotic  
268 and biotic environmental variables and matrotrophy using phylogenetic path analysis. Model  
269 selection identified two models with average  $\Delta\text{CIC}_c < 2$  across the 250 trees (Figure S3), including  
270 NPP, competition, and predation as predictor variables for variation in MI (Figure 3A). Both models  
271 indicated that NPP positively correlated with competition ( $r = 0.325$ , 95% CI = 0.324 – 0.326 for  
272 both supported models), which in turn was negatively correlated with matrotrophy (top model:  $r = -$   
273 0.030, 95% CI = -0.034 – -0.025; secondary model:  $r = -0.077$ , 95% CI = -0.081 – -0.075). In

274 addition, there was a positive relationship between NPP and matrotrophy (top model:  $r = 0.024$ ,  
275 95% CI = 0.022 – 0.025; secondary model:  $r = 0.023$ , 95% CI = 0.021 – 0.024). Simultaneously  
276 visualizing the effects of NPP and competition on matrotrophy indicated that high levels of  
277 matrotrophy occurred when NPP was high and competition was low (Figure 3B). This finding is  
278 consistent with the predictions of theoretical models that emphasize resource availability in the  
279 evolution of matrotrophy (Trexler & DeAngelis 2003). In the best supported model, NPP was also  
280 positively correlated with predation ( $r = 0.184$ , 95% CI = 0.183 – 0.185), which in turn was  
281 negatively correlated with matrotrophy ( $r = -0.082$ , 95% CI = -0.087 – -0.078). Notably, however,  
282 the directionality of the relationship between predation and matrotrophy was opposite to the  
283 predictions of the locomotor cost hypothesis, which posits that matrotrophy should enhance  
284 locomotor performance and be favored in high-predation environments (Gorini-Pacheco *et al.*  
285 2017). Although the effects sizes in the path analyses were relatively small, they were significantly  
286 different from zero, indicating that ecology has played a role in matrotrophy evolution.

287

## 288 **Discussion**

289 Shifts from pre- to post-fertilization maternal provisioning represent a major axis of life history  
290 evolution in viviparous organisms (Wourms 1981; Blackburn 1992). Using comparative phylogenetic  
291 analyses of livebearing fishes, we show that shifts in this life history trait preceded concomitant  
292 shifts in sexual selection, establishing a previously untested causative relationship (Haig 2014; Pollux  
293 *et al.* 2014). Moreover, we identified resource availability and competition as ecological tipping points  
294 facilitating bi-directional evolution along the lecithotrophy-matrotrophy continuum, in part  
295 supporting the predictions of theoretical models (Trexler & DeAngelis 2003) and experimental  
296 observations (Pollux & Reznick 2011). Our results indicate that ecology shaped life history

297 diversification of livebearing fishes, with cascading effects for evolutionary change in sexual  
298 selection (Pollux *et al.* 2014) and potentially speciation (Zeh & Zeh 2000; Zeh & Zeh 2008).

299 Life history evolution is generally assumed to progress from oviparity to lecithotrophic  
300 viviparity to matrotrophic viviparity (e.g., Furness *et al.* 2015). However, our analyses indicated that  
301 decreases in levels of matrotrophy were just as common as increases. Such bi-directional evolution  
302 along the lecithotrophy-matrotrophy continuum has been documented in other viviparous taxa (e.g.,  
303 Dulvy & Reynolds 1997; Reznick *et al.* 2007) and parallels secondary losses of obligate viviparity in  
304 fishes and reptiles (Parenti *et al.* 2010; Recknagel *et al.* 2018). The standard model of linear life history  
305 evolution therefore needs reevaluation to acknowledge that the evolution of these traits is more  
306 complex and dynamic than generally appreciated.

307 Ecological sources of selection appear to be important in driving bi-directional evolution  
308 along the lecithotrophy-matrotrophy continuum, as correlations between ecological variables and the  
309 degree of matrotrophy support adaptive hypotheses of life history evolution. Phylogenetic path  
310 analysis identified three biotic variables that were associated with variation in matrotrophy (resource  
311 availability, competition, and predation), all of which are well-documented drivers of life history  
312 diversification in animals (Stearns 1976; Martin 1995; Wilson 2014). Even though pregnancy in  
313 poeciliids has been experimentally linked to locomotor costs (Plaut 2002; Ghalambor *et al.* 2004),  
314 and there is evidence that matrotrophy increases streamlining (Fleuren *et al.* 2018) and is favored in  
315 high predation environments requiring efficient escape responses (Gorini-Pacheco *et al.* 2017), our  
316 macroevolutionary analyses indicated that the relationship between matrotrophy and predation was  
317 opposite to the predictions of the locomotor hypothesis. Rather, our results provided support for  
318 the resource availability hypothesis, demonstrating that high levels of matrotrophy coincided with  
319 low competition and high resource availability. This finding is consistent with the Trexler-DeAngelis  
320 model of matrotrophy evolution (Trexler & DeAngelis 2003), which predicts increases in

321 matrotrophy in environments with abundant and stable resources. In addition, experimental studies  
322 have shown that maternal provisioning strategies in poeciliids respond to resource availability  
323 (Trexler 1997; Marsh-Matthews & Deaton 2006).

324       Even though our results largely align with previous theoretical and empirical studies, there  
325 are some caveats that warrant additional consideration. Most importantly, it remains to be tested  
326 whether metrics of resource availability, competition, and predation used here to facilitate  
327 continental-scale analyses accurately reflect selective regimes experienced by different species. The  
328 challenges of quantifying complex variation in biotic interactions across the spatial and phylogenetic  
329 scales covered in this study highlights the need for microevolutionary analyses and experimental  
330 approaches on broader phylogenetic scales that allow for a better understanding of causal  
331 relationships (Culumber & Tobler 2018). For example, while there is experimental evidence for the  
332 fitness costs of matrotrophy under fluctuating resource conditions (Pollux & Reznick 2011), we still  
333 lack any empirical evidence indicating that matrotrophy provides fitness benefits over lecithotrophy  
334 under high and stable resource conditions (Pollux *et al.* 2009). In addition, it remains to be  
335 experimentally tested how resource availability and competition potentially interact in determining  
336 the success of different maternal provisioning strategies, especially because resource stress and  
337 competitive interactions may have non-additive effects (Hart & Marshall 2013; van Egmond *et al.*  
338 2018).

339

## 340 **Conclusions**

341 The role of ecological sources of selection as key drivers in life history evolution is well established  
342 at microevolutionary scales (Partridge & Harvey 1988; Reznick *et al.* 1990). Our study suggests that  
343 ecology also correlates with maternal provisioning strategies at macroevolutionary scales, suggesting  
344 that adaptation to resource availability and competition may be sufficient to explain life history

345 diversification in livebearing fishes and potentially in other viviparous taxa (Wourms 1981;  
346 Blackburn 1992). Ecology consequently provides the critical context for a number of other  
347 evolutionary phenomena that have been directly associated with shifts in maternal provisioning  
348 strategies, including the incidence of parent-offspring conflict, sexual selection, and speciation (Zeh  
349 & Zeh 2000; Crespi & Semeniuk 2004; Zeh & Zeh 2008).

350

### 351 **Acknowledgments**

352 This research was supported by the National Science Foundation (IOS-1557860 to MT). We thank  
353 members of the K-State Evolution Journal Club for constructive feedback on the manuscript.

354

### 355 **Data Sharing**

356 Data and scripts used to conduct this study will be made public on the authors' GitHub page  
357 (<https://github.com/michitobler>) upon acceptance of the manuscript. We are also willing to provide  
358 these materials to anyone evaluating our manuscript.

359

### 360 **References**

- 361 1. Ala-Honkola, O., Friman, E. & Lindström, K. (2011). Costs and benefits of polyandry in a  
362 placental poeciliid fish *Heterandria formosa* are in accordance with the parent-offspring conflict  
363 theory of placentation. *Journal of Evolutionary Biology*, 24, 2600-2610.
- 364 2. Alberici da Barbiano, L., Waller, J. & Gabor, C. (2010). Differences in competitive efficiency  
365 between a sexual parasite and its host provide insight into the maintenance of a sperm-  
366 dependent vertebrate species. *Journal of Freshwater Ecology*, 25, 523-530.
- 367 3. Arnold, S.J. (2003). Performance surfaces and adaptive landscapes. *Integrative and Comparative*  
368 *Biology*, 43, 367-375.



- 369 4. Bisazza, A., Grapputo, A. & Nigro, L. (1997). Evolution of reproductive strategies and male  
370 sexual ornaments in poeciliid fishes as inferred by mitochondrial 16 rDNA gene phylogeny.  
371 *Ethology, Ecology & Evolution*, 9, 55-67.
- 372 5. Blackburn, D.G. (1992). Convergent evolution of viviparity, matrotrophy, and specializations for  
373 fetal nutrition in reptiles and other vertebrates. *American Zoologist*, 32, 313-321.
- 374 6. Boschung, H.T., Mayden, R.L. & Tomelleri, J.R. (2004). *Fishes of Alabama*. Smithsonian Books,  
375 Washinton, D. C.
- 376 7. Burnham, K.P. & Anderson, D.R. (2002). *Model selection and multimodel inference: a practical information-*  
377 *theoretic approach*. Springer, New York, NY.
- 378 8. Bussing, W.A. (1998). *Peces de las Aguas Continentales de Costa Rica - Freshwater Fishes of Costa Rica*. 2nd  
379 edn. Editorial de la Universidad de Costa Rica, San José.
- 380 9. Campiglia, S.S. & Walker, M.H. (1995). Developing embryo and cyclic changes in the uterus of  
381 *Peripatus (Macroperipatus) acacioi* (Onychophora, Peripatidae). *Journal of Morphology*, 224, 179-  
382 198.
- 383 10. Candolin, U. & Heuscheke, J. (2008). Is sexual selection beneficial during adaptation to  
384 environmental change? *Trends in Ecology & Evolution*, 23, 446-452.
- 385 11. Chenoweth, S.F., Appleton, N.C., Allen, S.L. & Rundle, H.D. (2015). Genomic evidence that  
386 sexual selection impedes adaptation to a novel environment. *Current Biology*, 25, 1860-1866.
- 387 12. Clavel, J., Escarguel, G. & Merceron, G. (2015). mvMORPH: an R package for fitting  
388 multivariate evolutionary models to morphometric data. *Methods in Ecology and Evolution*, 6,  
389 1311-1319.
- 390 13. Coleman, S.W., Harlin-Cognato, A. & Jones, A.G. (2009). Reproductive isolation, reproductive  
391 mode, and sexual selection: empirical tests of the viviparity-driven conflict hypothesis.  
392 *American Naturalist*, 173, 291-303.

- 393 14. Crespi, B. & Semeniuk, C. (2004). Parent-offspring conflict in the evolution of vertebrate  
394 reproductive mode. *American Naturalist*, 163, 635-653.
- 395 15. Culumber, Z.W. & Tobler, M. (2017). Sex-specific evolution during the diversification of live-  
396 bearing fishes. *Nature Ecology & Evolution*, 1, 1185-1191.
- 397 16. Culumber, Z.W. & Tobler, M. (2018). Correlated evolution of thermal niches and functional  
398 physiology in tropical freshwater fishes. *Journal of Evolutionary Biology*, 31, 722-734.
- 399 17. Dulvy, N.K. & Reynolds, J.D. (1997). Evolutionary transitions among egg-laying, live-bearing  
400 and maternal inputs in sharks and rays. *Proceedings of the Royal Society B*, 264, 1309-1315.
- 401 18. Endler, J.A. (1983). Natural and sexual selection on color patterns in poeciliid fishes.  
402 *Environmental Biology of Fishes*, 9, 173-190.
- 403 19. Evans, J.P., Pilastro, A. & Schlupp, I. (2011). Ecology and Evolution of Poeciliid Fishes. The  
404 University of Chicago Press Chicago, IL, p. 380.
- 405 20. Fleuren, M., Quicazan-Rubio, E.M., van Leeuwen, J.L. & Pollux, B.J.A. (2018). Why do placentas  
406 evolve? Evidence for a morphological advantage during pregnancy in live-bearing fish. *PLoS*  
407 *ONE*, 13, e0195976.
- 408 21. Furness, A.I., Morrison, K.R., Orr, T.J., Arendt, J.D. & Reznick, D.N. (2015). Reproductive  
409 mode and the shifting arenas of evolutionary conflict. *Annals of the New York Academy of*  
410 *Sciences*, 1360, 75-100.
- 411 22. Ghilambor, C.K., Reznick, D.N. & Walker, J.A. (2004). Constraints on adaptive evolution: the  
412 functional trade-off between reproduction and fast-start swimming performance in the  
413 Trinidadian guppy (*Poecilia reticulata*). *American Naturalist*, 164, 38-50.
- 414 23. Gorini-Pacheco, B., Zandonà, E. & Mazzone, R. (2017). Predation effects on matrotrophy,  
415 superfetation and other life history traits in *Phalloceros harpagos*. *Ecology of Freshwater Fish*, 27,  
416 442-452.

- 417 24. Greenfield, D.W. & Thomerson, J.E. (1997). *Fishes of the continental waters of Belize*. The University  
418 Press of Florida, Gainesville.
- 419 25. Greven, H. (2005). Structural and behavioral traits associated with sperm transfer in Poeciliidae.  
420 In: *Viviparous Fishes* (eds. Uribe, MC & Grier, H). New Life Publications Homestead, FL, pp.  
421 145-163.
- 422 26. Haig, D. (2014). Sexual selection: placentation, superfetation, and coercive copulation. *Current*  
423 *Biology*, 24, R805-R808.
- 424 27. Hart, M.W., Byrne, M. & Smith, M.J. (1997). Molecular phylogenetic analysis of life-history  
425 evolution in asterinid starfish. *Evolution*, 51, 1848-1861.
- 426 28. Hart, S.P. & Marshall, D.J. (2013). Environmental stress, facilitation, competition, and  
427 coexistence. *Ecology*, 94, 2719-2731.
- 428 29. Ho, A.F.L.C., Pruet, C.L. & Lin, J. (2016). Phylogeny and biogeography of *Poecilia*  
429 (Cypinodontiformes: Poeciliinae) across Central and South America based on mitochondrial  
430 and nuclear DNA markers. *Molecular Phylogenetics and Evolution*, 101, 32-45.
- 431 30. Hrbek, T., Seckinger, J. & Meyer, A. (2007). A phylogenetic and biogeographic perspective on  
432 the evolution of poeciliid fishes. *Molecular Phylogenetics and Evolution*, 43, 986-998.
- 433 31. Johnson, J.B. & Omland, K.S. (2004). Model selection in ecology and evolution. *Trends in Ecology*  
434 *& Evolution*, 19, 101-108.
- 435 32. Korneva, Z.V. (2005). Placental type interactions and evolutionary trends of development of  
436 uterus in cestodes. *Journal of Evolutionary Biochemistry and Physiology*, 41, 552-560.
- 437 33. Korniushev, A.V. & Glaubrecht, M. (2003). Novel reproductive modes in freshwater clams:  
438 brooding and larval morphology in southeast Asian taxa of *Corbicula* (Mollusca, Bivalvia,  
439 Corbiculidae). *Acta Zoologica*, 84, 293-315.

- 440 34. Long, T.A.F. (2005). The influence of mating system on the intensity of parent-offspring conflict  
441 in primates. *Journal of Evolutionary Biology*, 18, 509-515.
- 442 35. Lorch, P.D., Proulx, S., Rowe, L. & Day, T. (2003). Condition-dependent sexual selection can  
443 accelerate adaptation. *Evolutionary Ecology Research*, 5, 867-881.
- 444 36. Maan, M.E. & Seehausen, O. (2011). Ecology, sexual selection and speciation. *Ecology Letters*, 14,  
445 591-602.
- 446 37. Magnhagen, C. (1991). Predation risk as a cost of reproduction. *Trends in Ecology and Evolution*, 6,  
447 183-185.
- 448 38. Marsh-Matthews, E. & Deaton, R. (2006). Resources and offspring provisioning: A test of the  
449 Trexler-DeAngelis model for matrotrophy evolution. *Ecology*, 87, 3014-3020.
- 450 39. Martin, S.B., Albert, J.S. & Leberg, P.L. (2010). The evolution of the poeciliid gonopodium:  
451 integrating morphological and behavioral traits. In: *Viviparous Fishes II* (eds. Uribe, MC &  
452 Grier, HJ). New Life Publications Homestead, FL.
- 453 40. Martin, T.E. (1995). Avian life history evolution in relation to nest sites, nest predation, and  
454 food. *Ecological Monographs*, 65, 101-127.
- 455 41. Mateos, M., Sanjur, O.I. & Vrijenhoek, R.C. (2002). Historical biogeography of the livebearing  
456 fish genus *Poeciliopsis* (Poeciliidae: Cyprinodontiformes). *Evolution*, 56, 972-984.
- 457 42. Meffe, G.K. & Snelson, F.F. (1989). An ecological overview of poeciliid fishes. In: *Ecology and*  
458 *evolution of lifebearing fishes (Poeciliidae)* (eds. Meffe, GK & Snelson, FF). Prentice Hall New  
459 Jersey, pp. 13-31.
- 460 43. Meyer, A., Morrissey, J. & Scharl, M. (1994). Recurrent origin of a sexually selected trait in  
461 *Xiphophorus* fishes inferred from a molecular phylogeny. *Nature*, 368, 539-542.
- 462 44. Miles, D.B., Sinervo, B. & Frankino, W.A. (2000). Reproductive burden, locomotor  
463 performance, and the cost of reproduction in free ranging lizards. *Evolution*, 54, 1386-1395.

- 464 45. Miller, R.R. (1975). Five new species of Mexican poeciliid fishes of the genera *Poecilia*, *Gambusia*,  
465 and *Poeciliopsis*. *Occasional Papers of the Museum of Zoology, University of Michigan*, 672, 1-44.
- 466 46. Miller, R.R., Minckley, W. & Norris, S. (2005). *Freshwater fishes of Mexico*. University of Chicago  
467 Press, Chicago.
- 468 47. Nychka, D., Furrer, R., Paige, J. & Sain, S. (2007). fields: tools for spatial data. *R package version*  
469 *9.6*.
- 470 48. Olivera-Tlahuel, C., Ossip-Klein, A.G., Espinosa-Pérez, H.S. & Zúñiga-Vega, J.J. (2015). Have  
471 superfetation and matrotrophy facilitated the evolution of larger offspring in poeciliid fishes?  
472 *Biological Journal of the Linnean Society*, 116, 787-804.
- 473 49. Ostrovsky, A.N., Lidgard, S., Gordon, D.P., Schwaha, T., Genikhovich, G. & Ereskovsky, A.V.  
474 (2016). Matrotrophy and placentation in invertebrates: a new paradigm. *Biological Reviews*, 91,  
475 673-711.
- 476 50. Parenti, L.R., LoBNostro, F.L. & Grier, H. (2010). Reproductive histology of *Tomeurus gracilis*  
477 Eigenmann, 1909 (Teleostei: Atherinomorpha: Poeciliidae) with comments on evolution of  
478 viviparity in atherinomorph fishes. *Journal of Morphology*, 27, 1399-1406.
- 479 51. Parrett, J.M. & Knell, R.J. (2018). The effect of sexual selection on adaptation and extinction  
480 under increasing temperatures. *Proceedings of the Royal Society B*, 285, 20180303.
- 481 52. Partridge, L. & Harvey, P.H. (1988). The ecological context of life history evolution. *Science*, 241,  
482 1449-1455.
- 483 53. Pires, M.N., Banet, A.I., Pollux, B.J.A. & Reznick, D.N. (2011). Variation and evolution of  
484 reproductive strategies. In: *Ecology and Evolution of Poeciliid Fishes* (eds. Evans, JP, Pilastro, A &  
485 Schlupp, I). University of Chicago Press Chicago, IL, pp. 28-37.
- 486 54. Plaut, I. (2002). Does pregnancy affect swimming performance in female mosquitofish, *Gambusia*  
487 *affinis*? *Functional Ecology*, 16, 290-295.

- 488 55. Pollux, B., Pires, M., Banet, A. & Reznick, D. (2009). Evolution of placentas in the fish family  
489 Poeciliidae: an empirical study of macroevolution. *Annual Review of Ecology Evolution and*  
490 *Systematics*, 40, 271-289.
- 491 56. Pollux, B.J.A., Meredith, R.W., Springer, M.S., Garland, T. & Reznick, D.N. (2014). The  
492 evolution of the placenta drives a shift in sexual selection in livebearing fish. *Nature*, 513,  
493 233-236.
- 494 57. Pollux, B.J.A. & Reznick, D.N. (2011). Matrotrophy limits a female's ability to adaptively adjust  
495 offspring size and fecundity in fluctuating environments. *Functional Ecology*, 25, 747-756.
- 496 58. Recknagel, H., Kamenos, N.A. & Elmer, K.R. (2018). Common lizards break Dollo's law of  
497 irreversibility: genome-wide phylogenomics support a single origin of viviparity and re-  
498 evolution of oviparity. *Molecular Phylogenetics and Evolution*, 127, 579-588.
- 499 59. Revell, L.J. (2012). phytools: an R package for phylogenetic comparative biology (and other  
500 things). *Methods in Ecology and Evolution*, 3, 217-223.
- 501 60. Reznick, D., Bryga, H. & Endler, J.A. (1990). Experimentally induced life-history evolution in a  
502 natural population. *Nature*, 346, 357-359.
- 503 61. Reznick, D., Mateos, M. & Springer, M. (2002). Independent origins and rapid evolution of the  
504 placenta in the fish genus *Poeciliopsis*. *Science*, 298, 1018-1020.
- 505 62. Reznick, D., Meredith, R. & Collette, B.B. (2007). Independent evolution of complex life history  
506 adaptation in two families of fishes, live-bearing halfbeaks (Zenarchopteridae, Beloniformes)  
507 and Poeciliidae (Cyprinodontiformes). *Evolution*, 61, 2570-2583.
- 508 63. Reznick, D.N., Furness, A.I., Meredith, R.W. & Springer, M.S. (2017). The origin and  
509 biogeographic diversification of fishes in the family Poeciliidae. *PLoS ONE*, 12, e0172546.
- 510 64. Rodriguez, C.C. (2005). The ABC of model selection: AIC, BIC, and the new CIC. *AIP Conference*  
511 *Proceedings*, 803, 80-87.

- 512 65. Rundle, H.D., Chenoweth, S.F. & Blows, M.W. (2009). The diversification of mate preferences  
513 by natural and sexual selection. *Journal of Evolutionary Biology*, 22, 1608-1615.
- 514 66. Ryan, M.J. (1998). Sexual selection, receiver biases, and the evolution of sex differences. *Science*,  
515 281, 1999-2003.
- 516 67. Salzburger, W. (2009). The interaction of sexually and naturally selected traits in the adaptive  
517 radiations of cichlid fishes. *Molecular Ecology*, 18, 169-185.
- 518 68. Santini, F., Harmon, L.J., Carnevale, G. & Alfaro, M.E. (2009). Did genome duplication drive the  
519 origin of teleosts? A comparative study of diversification in ray-finned fishes. *BMC*  
520 *Evolutionary Biology*, 9, 1.
- 521 69. Shaffer, L.R. & Formanowicz, D.R. (1996). A cost of viviparity and parental care in scorpions:  
522 reduced sprint speed and behavioral compensation. *Animal Behavior*, 51, 1017-1024.
- 523 70. Stamatakis, A. (2014). RAxML version 8: a tool for phylogenetic analysis and post-analysis of  
524 large phylogenies. *Bioinformatics*, 30, 1312-1313.
- 525 71. Stearns, S.C. (1976). Life-history tactics: a review of ideas. *Quarterly Review of Biology*, 51, 3-47.
- 526 72. Steward, J.R. & Blackburn, D.G. (1988). Reptilian placentation: structural diversity and  
527 terminology. *Copeia*, 1988, 839-852.
- 528 73. Thibault, R.E. & Schultz, R.J. (1978). Reproductive adaptations among viviparous fishes  
529 (Cyprinodontiformes: Poeciliidae). *Evolution*, 32, 320-333.
- 530 74. Torres-Dowdall, J., Dargent, F., Handelsman, C.A., Ramnarine, I.W. & Ghalambor, C.K. (2013).  
531 Ecological correlated of the distribution limites of two poeciliid species along a salinity  
532 gradient. *Biological Journal of the Linnean Society*, 108, 790-805.
- 533 75. Trexler, J.C. (1997). Resource availability and plasticity in offspring provisioning: Embryo  
534 nourishment in sailfin mollies. *Ecology*, 78, 1370-1381.

- 535 76. Trexler, J.C. & DeAngelis, D.L. (2003). Resource allocation in offspring provisioning: An  
536 evaluation of the conditions favoring the evolution of matrotrophy. *American Naturalist*, 162,  
537 574-585.
- 538 77. van der Bijl, W. (2018). phylopath: easy phylogenetic path analysis in R. *PeerJ*, 6, e4718.
- 539 78. van der Sleen, P. & Albert, J.S. (2017). Field guide to the fishes of the Amazon, Orinoco, and  
540 Guianas. Princeton University Press Princeton.
- 541 79. van Egmond, E.M., van Bodegom, P.M., van Hal, J.R., van Logtestijn, P.S.P., Berg, M.P. &  
542 Aerts, R. (2018). Nonadditive effects of consumption in an intertidal macroinvertebrate  
543 community are independent of food availability but driven by complementarity effects.  
544 *Ecology and Evolution*, 8, 3086-3097.
- 545 80. van Proosdij, A.S., Sosef, M.S., Wieringa, J.J. & Raes, N. (2015). Minimum required number of  
546 specimen records to develop accurate species distribution models. *Ecography*.
- 547 81. Wake, M.H. & Dickie, R. (1998). Oviduct structure and function and reproductive modes in  
548 amphibians. *Journal of Experimental Zoology*, 282, 477-506.
- 549 82. Weber, M.G., Mitko, L., Eltz, T. & Ramírez, S.R. (2016). Macroevolution of perfume signalling  
550 in orchid bees. *Ecology Letters*, 19, 1314-1323.
- 551 83. Wildman, D.E., Chen, C., Erez, O., Grossman, L.I., Goodman, M. & Romero, R. (2006).  
552 Evolution of the mammalian placenta revealed by phylogenetic analysis. *Proceedings of the*  
553 *National Academy of Sciences USA*, 103, 3203-3208.
- 554 84. Wilson, A.J. (2014). Competition as a source of constraint on life history evolution in natural  
555 populations. *Heredity*, 112, 70-78.
- 556 85. Wooding, P. & Burton, G. (2008). *Comparative placentation: structures, functions and evolution*. Springer-  
557 Verlag, Berlin.



- 558 86. Wourms, J.P. (1981). Viviparity: the maternal-fetal relationship in fishes. *American Zoologist*, 21,  
559 473-515.
- 560 87. Wourms, J.P., Grove, B.D. & Lombardi, J.L. (1988). The maternal-fetal relationship in  
561 viviparous fishes. In: *Fish Physiology* (ed. Hoar, WS). Academic Press London, pp. 2-134.
- 562 88. Zeh, D.W. & Zeh, J.A. (2000). Reproductive mode and speciation: the viviparity-driven conflict  
563 hypothesis. *Bioessays*, 22, 938-946.
- 564 89. Zeh, J.A. & Zeh, D.W. (2008). Viviparity-driven conflict. *Annals of the New York Academy of*  
565 *Sciences*, 1133, 126-148.
- 566
- 567

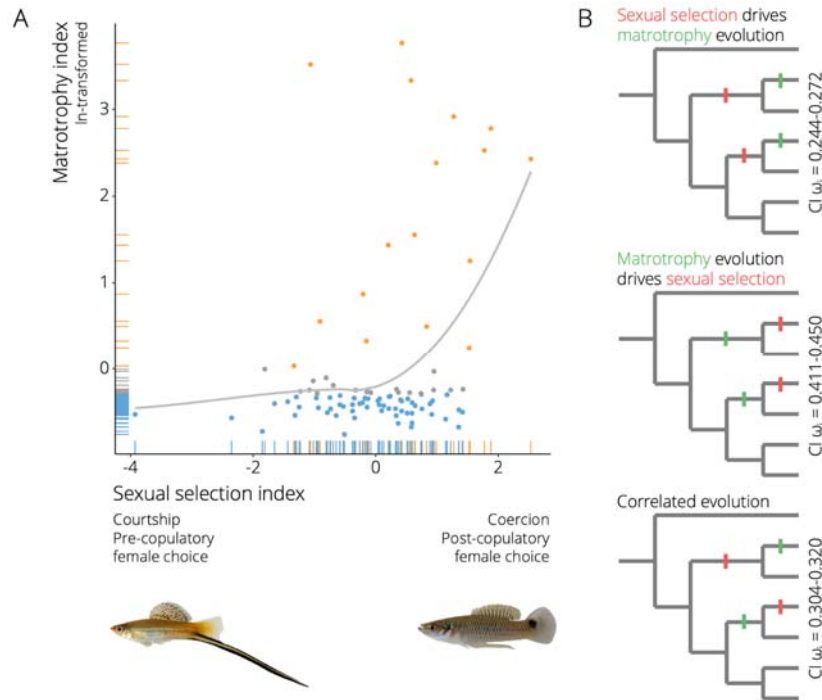

568

569 Figure 1. A. Correlation between sexual selection (quantified through a Sexual Selection Index, SSI)

570 and maternal provision strategies (quantified through a Matrotrophy Index, MI; see text for details).

571 Blue dots represent species that are clearly lecithotrophic ( $MI < 0.75$ ), orange dots species that are

572 clearly matrotrophic ( $MI > 1$ ), and gray dot species with intermediate strategies (incipient

573 matrotrophy). The gray line represents the best fit line of a Loess regression. B. Alternative

574 hypotheses about the order of evolutionary shifts in sexual selection and life history shifts that could

575 give rise to the observed coevolution of traits. If variation in sexual selection drives matrotrophy

576 evolution, we expect shifts in SSI (red) to precede shifts in MI (green; see top panel). If variation in

577 maternal provision strategies drives shifts in sexual selection, we expect shifts in MI to precede shifts

578 in SSI (middle). Finally, if the same (or correlated) environmental factors exert selection on SSI and

579 MI without pleiotropic interactions among traits, there may be no clear order of trait shifts across

580 the phylogeny (bottom). We also provide confidence intervals (CI) of Akaike weights ( $\omega_i$ ) for

581 evolutionary time-lag analyses across 250 trees, indicating best support for the model with shifts in

582 MI predating shifts in SSI.

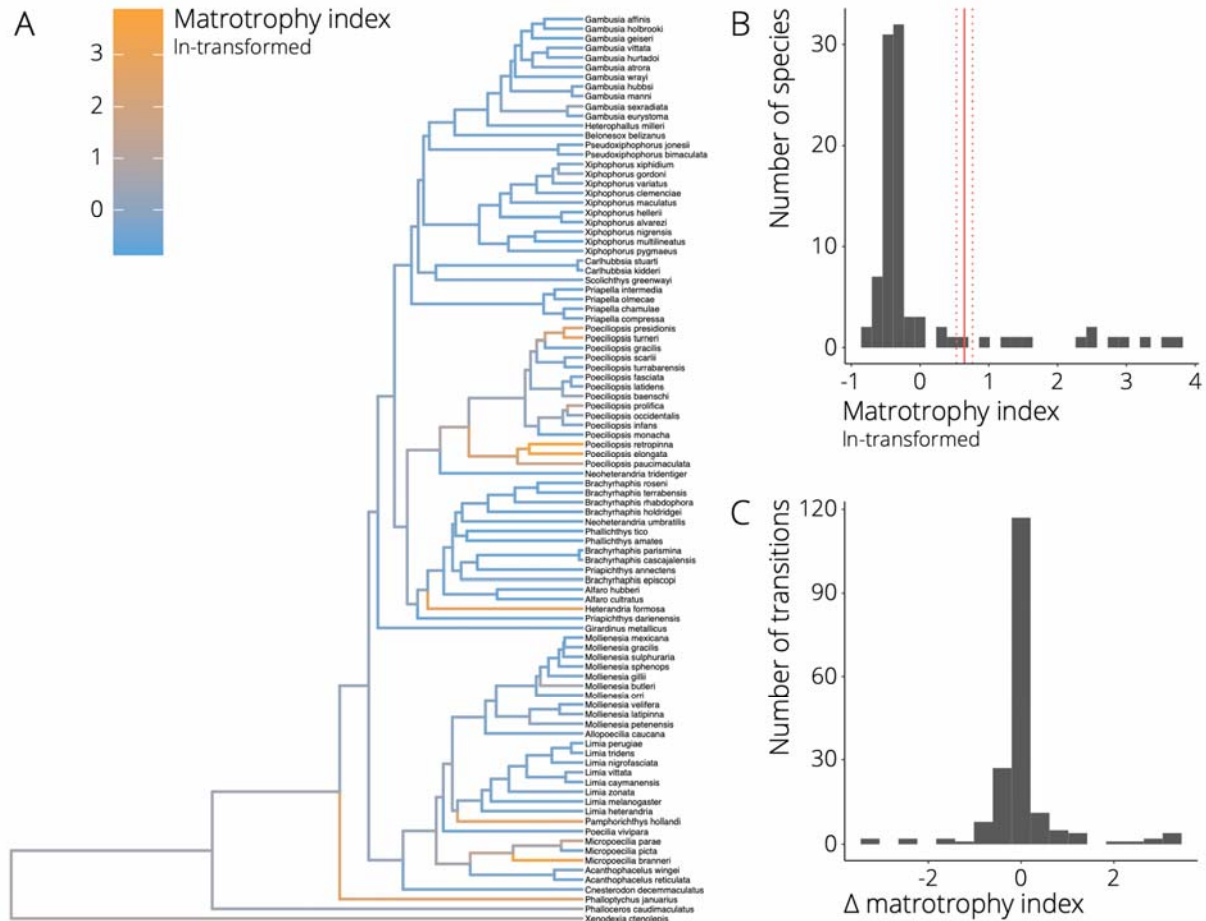

Figure 2. A. Best-scoring maximum likelihood tree of 94 species in the family Poeciliidae. The ancestral state reconstruction of matrotrophy is mapped onto the phylogeny, with blue colors depicting lecithotrophy and orange colors matrotrophy (as indicated by the color scale of ln-transformed matrotrophy index values). B. Frequency histogram of the distribution of matrotrophy index values in extant poeciliid species. The solid red line represents the average ancestral state reconstruction for the matrotrophy index across 250 random trees with dotted lines indicating the 95% confidence interval for the estimate. C. Frequency histogram depicting the relative change in matrotrophy index between all nodes and their descendants.

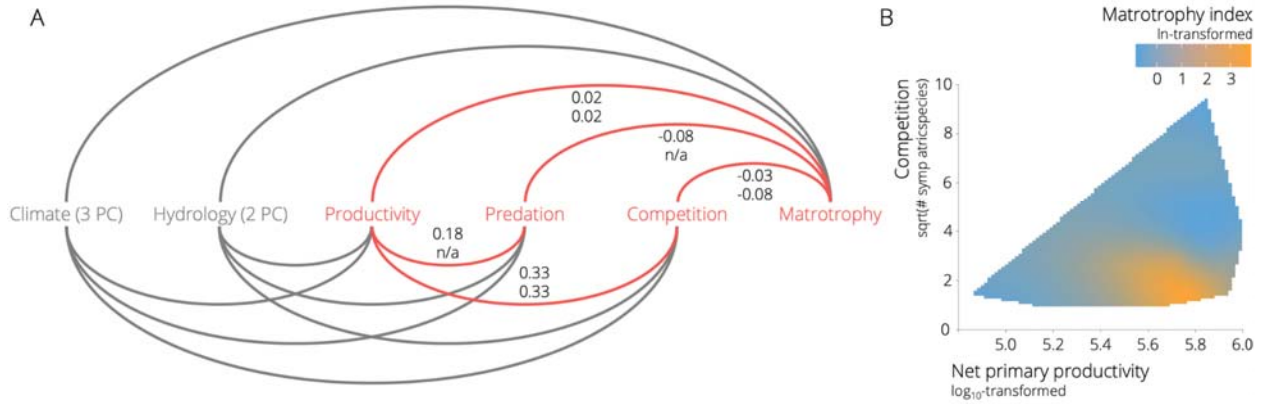

593

594 Figure 3. A. Representation of the full model used for phylogenetic path analysis (see Figure S2 for a  
595 comprehensive depiction of alternative models). Highlighted in red are variables and paths

596 associated with the top models exhibiting  $\Delta\text{CIC}_c < 2$ . Numbers represent correlation coefficients ( $r$ )

597 between variables for the top model (top number) and the secondary model (bottom number). Note

598 that the factor predation was absent from the secondary model. B. Landscape of matrotrophy

599 variation as a function of net primary productivity and competition. Colors correspond to variation

600 in matrotrophy, with blue colors depicting maternal provisioning strategies toward the lecithotrophy

601 end of the spectrum and orange colors strategies toward the matrotrophy end (as indicated by the

602 color scale of ln-transformed matrotrophy index values).
