1 **Ecology and the diversification of reproductive strategies in**

2 **viviparous fishes**

3

4 Michael Tobler<sup>1\*</sup> & Zachary Culumber<sup>2</sup>

5

6 <sup>1</sup>Division of Biology, Kansas State University, Manhattan, KS 66506, USA

7 <sup>2</sup>Department of Biological Sciences, University of Alabama in Huntsville, Huntsville, AL 35899,

8 USA

9

10 \*Corresponding author: Michael Tobler, Division of Biology, Kansas State University, 106 Ackert

11 Hall, Manhattan, KS, USA; phone: +1-785-532-6652; email: [tobler@ksu.edu](mailto:tobler@ksu.edu)

12

13 **Abstract**

14 Shifts in life history evolution can potentiate sexual selection and speciation. However, we rarely  
15 understand the causative links between correlated patterns of diversification or the tipping points  
16 that initiate changes with cascading effects. We investigated livebearing fishes with repeated  
17 transitions from pre- (lecithotrophy) to post-fertilization maternal provisioning (matrotrophy) to  
18 identify the potential ecological drivers of evolutionary transitions in life history. Phylogenetic  
19 comparative analyses across 94 species revealed that bi-directional evolution along the lecithotrophy-  
20 matrotrophy continuum is correlated with ecology, supporting adaptive hypotheses of life history  
21 diversification. Consistent with theory, matrotrophy was associated with high resource availability  
22 and low competition. Our results suggest that ecological sources of selection contribute to the  
23 diversification of female provisioning strategies in livebearing fishes, which have been associated  
24 with macroevolutionary patterns of sexual selection and speciation.

25

26 *Keywords:* life history evolution | natural selection | phylogenetic comparative analysis | Poeciliidae

27

## 28 **Introduction**

29 Evolutionary transitions in maternal provisioning strategies represent a primary axis of reproductive  
30 life history variation in viviparous organisms (Wourms 1981; Blackburn 1992). Shifts from an  
31 ancestral strategy of females providing all resources for embryonic development prior to fertilization  
32 (lecithotrophy) to post-fertilization provisioning (matrotrophy) have been associated with the  
33 evolution of complex physiological and morphological adaptations, including placental structures of  
34 apposed maternal and embryonic tissues that facilitate nutrient transfer (Wooding and Burton 2008).  
35 Matrotrophy and placentas have evolved repeatedly in viviparous animals, including multiple  
36 invertebrate (Campiglia and Walker 1995; Hart et al. 1997; Korniusshin and Glaubrecht 2003;  
37 Korneva 2005; Ostrovsky et al. 2016) and vertebrate lineages (Steward and Blackburn 1988;  
38 Wourms et al. 1988; Wake and Dickie 1998; Wildman et al. 2006). Transitions along the  
39 lecithotrophy-matrotrophy continuum may have far reaching consequences, shaping the evolution  
40 of other traits and patterns of biological diversification (Zeh and Zeh 2000; Coleman et al. 2009;  
41 Pollux et al. 2014; Furness et al. 2015; Furness et al. 2019). What evolutionary forces shape the  
42 evolution of matrotrophy, however, remains unclear (Pollux et al. 2009).

43       There are two, non-mutually exclusive hypotheses that view matrotrophy as an adaptation to  
44 ecological sources of selection: (1) Matrotrophy has been hypothesized to reduce locomotor costs  
45 associated with pregnancy (Magnhagen 1991; Shaffer and Formanowicz 1996; Miles et al. 2000).  
46 Specifically, lecithotrophic females are expected to suffer from impaired locomotion throughout  
47 gestation, while matrotrophic females with initially small embryos should avoid such costs at least in  
48 early stages of pregnancy (Miller 1975; Thibault and Schultz 1978). (2) Resource availability may  
49 shape evolution along the lecithotrophy-matrotrophy continuum. Lecithotrophy is expected to be  
50 adaptive in environments with fluctuating resource availability (Thibault and Schultz 1978), whereas

51 matrotrophy theoretically maximizes reproductive output when resource availability is high and  
52 stable (Trexler and DeAngelis 2003).

53 Livebearing fishes of the family Poeciliidae are an iconic model system for testing  
54 hypotheses about the evolution of reproductive strategies at micro- and macroevolutionary scales  
55 (Evans et al. 2011). Poeciliids have undergone remarkable diversification in levels of post-  
56 fertilization maternal provisioning, with independent origins of matrotrophy in different clades  
57 (Reznick et al. 2002; Pollux et al. 2009; Pollux et al. 2014). Research on poeciliid fishes has been  
58 instrumental for the advancement of our theoretical and empirical understanding of matrotrophy  
59 (Thibault and Schultz 1978; Pollux et al. 2009; Pires et al. 2011), and there is evidence supporting  
60 various predictions of both adaptive hypotheses of matrotrophy evolution. Pregnancy in poeciliids  
61 has been shown to be associated with locomotor costs (Plaut 2002; Ghalambor et al. 2004;  
62 Quicazan-Rubio et al. 2019), and there is evidence that matrotrophy increases streamlining (Fleuren  
63 et al. 2018) and may be favored in high predation environments requiring efficient escape responses  
64 (Gorini-Pacheco et al. 2017; Hagmayer et al. 2020). At the same time, post-fertilization maternal  
65 provisioning also responds to resource availability and female condition (Trexler 1997; Marsh-  
66 Matthews and Deaton 2006; Hagmayer et al. 2018), and matrotrophy is associated with significant  
67 costs when resources fluctuate (Pollux and Reznick 2011). However, most empirical tests of the  
68 potential adaptive function of matrotrophy have been conducted at microevolutionary scales and  
69 using just a small number of species, leaving questions about the generalizability of past findings.

70 Here, we used phylogenetic comparative analyses of matrotrophy evolution across 94 species  
71 spanning the family Poeciliidae. Species in this family are broadly distributed throughout the  
72 Americas, found in a wide variety of ecological contexts, and have a well-resolved phylogeny (Meffe  
73 and Snelson 1989; Hrbek et al. 2007; Reznick et al. 2017), facilitating comparative analyses that  
74 contrast hypotheses about the evolutionary origins of matrotrophy. To do so, we first characterized

75 the evolutionary dynamics of matrotrophy evolution and then used phylogenetic path analysis to test  
76 for correlations between ecological variables and variation in matrotrophy.

77

## 78 **Methods**

### 79 ***Taxon sampling and phylogenetic framework***

80 Our analyses included 94 species (Table S1), encompassing representatives of all major genera in the  
81 family Poeciliidae. These species span a geographic range from the eastern United States south to  
82 Argentina, including Caribbean islands (Figure S1). The phylogenetic framework used for analyses  
83 was established by previous studies with similar taxon sampling (Pollux et al. 2014; Culumber and  
84 Tobler 2017). In brief, sequences for six mitochondrial (*12S*, *COI*, *CytB*, *ND2*, *tRNA<sup>Valu</sup>*, and  
85 *tRNA<sup>Leu</sup>*) and 11 nuclear genes (*Beta Actin*, *CCND1*, *ENC1*, *GLYT*, *MYH6*, *RAG1*, *Rhodopsin*, *RPS7*,  
86 *SH3PX3*, *T36*, and *XSRC*) were obtained from GenBank, aligned, and maximum likelihood  
87 phylogenetic analysis was conducted using RAxML-HPC version 8 (Stamatakis 2014) on the  
88 CIPRES computer cluster (San Diego State University, San Diego, CA, USA). The resulting best  
89 scoring tree was highly consistent with previously published phylogenetic hypotheses for the family  
90 Poeciliidae (Hrbek et al. 2007; Pollux et al. 2014; Reznick et al. 2017). Phylogenetic trees were time  
91 calibrated with three calibration points spanning the depth of the phylogeny (see Culumber and  
92 Tobler 2017 for details), including a primary fossil calibration associated with the split separating the  
93 outgroup (*Fundulus*) from all poeciliids (55-99 Ma; Santini et al. 2009) and a secondary fossil  
94 calibration separating *Heterandria formosa* from the genus *Poecilia* (9.3-19 Ma; Ho et al. 2016). In  
95 addition, the formation of Laguna de Catemaco (Mexico), a crater lake with several endemic species,  
96 was used as a constraint on the age of the endemic *Poeciliopsis catemaco* (0.5-2.0 Ma; Mateos et al.  
97 2002). Even though bootstrap support values of the best scoring tree were generally strong,

98 phylogenetic comparative methods described below were conducted across 250 trees drawn at  
99 random from the bootstrap replicates to account for phylogenetic uncertainty.

100

### 101 ***Quantifying matrotrophy and sexual selection***

102 Matrotrophy levels for all species included in the analysis were obtained from previously published  
103 studies (Pollux et al. 2014; Olivera-Tlahuel et al. 2015). The extent of post-fertilization maternal  
104 provisioning was quantified using the matrotrophy index (MI, ln-transformed for all analyses), which  
105 is the ratio of offspring mass at birth to the mass of the egg at fertilization (Reznick et al. 2002;  
106 Pollux et al. 2009). Offspring of lecithotrophic species typically lose 25-55% of the initial egg mass  
107 during development ( $MI < 0.75$ ), while continuous nutrient transfer from mother to offspring  
108 during gestation in matrotrophic species leads to  $MI > 1$  (Reznick et al. 2002; Pollux et al. 2009).

109

### 110 ***Evolutionary dynamics of maternal provisioning strategies***

111 To characterize the evolutionary dynamics of matrotrophy evolution, we conducted ancestral state  
112 reconstructions of MI using PHYTOOLS (Revell 2012). To evaluate the directionality of matrotrophy  
113 evolution (increases *vs.* decreases in MI) between each node and its descendants, we extracted trait  
114 reconstructions for each node of the tree and calculated  $\Delta MI$  as the observed (tip) or inferred (node)  
115 matrotrophy values subtracted from the values of its most recent ancestral node.

116

### 117 ***Identifying ecological correlates of variation in maternal provision strategies***

118 To test the competing hypotheses for matrotrophy evolution, we assembled a set of relevant  
119 environmental predictor variables. According to the locomotor hypothesis, matrotrophy should be  
120 associated with environments that favor high locomotor performance, such as habitats with high  
121 predation pressure or fast water currents (Reznick et al. 2007; Gorini-Pacheco et al. 2017). Hence,

122 predictor variables included metrics of hydrology (based on the topography of each species' range)  
123 and predation (number of predatory fish species overlapping each species' range). According to the  
124 resource availability hypothesis, matrotrophy should be associated with environments where  
125 resources are abundant and competition is low (Trexler and DeAngelis 2003). Hence, we quantified  
126 climate (including estimates of temporal variability in temperature and precipitation patterns in each  
127 species' range), average net primary productivity (NPP), and competition (number of poeciliid  
128 species overlapping each species' range). The potential effects of different environmental variables  
129 on variation in maternal provisioning strategies was evaluated with phylogenetic path analysis as  
130 outlined below.

131

### 132 *Quantifying hydrology, climate, and net primary productivity*

133 Assembly of hydrological and climate variables associated with each species' range was based on  
134 georeferenced occurrence points. We obtained 73,398 locality points from multiple sources  
135 (<http://fishnet2.net/>, <http://gbif.org/>, primary literature), representing the known distributions for  
136 all 94 species included in our study. We first removed duplicate points and retained a maximum of  
137 100 randomly sampled localities within the native range of each species, which is sufficient to  
138 capture environmental variation even in wide-ranging species (van Proosdij et al. 2015). We further  
139 verified that all data points for a given species were at least 1 km apart to match the spatial  
140 resolution of environmental data. Any locality that did not meet this criterion was either removed  
141 for species with <100 localities or replaced by another randomly drawn locality for species with  
142 >100 localities. For all locality records, we then extracted values for three hydrological variables  
143 (elevation, slope and compound topographic index; Hydro1k:  
144 <https://lta.cr.usgs.gov/HYDRO1K/>), 19 climatic variables (Worldclim: <http://worldclim.org/>), and  
145 an estimate of net primary productivity (<https://lpdaac.usgs.gov/>) at a spatial resolution of  $\sim 1 \text{ km}^2$

146 (30 arcsec) in ArcMap version 10.2.2 (ESRI Inc, Redlands, CA, USA). For each species, we  
147 calculated the median value for all 23 variables. Climatic and hydrological variables were then  
148 subjected to separate phylogenetic principal component analyses (pPCA) using a correlation matrix,  
149 as implemented in the PHYTOOLS package in R (Revell 2012). In addition to the estimate of net  
150 primary productivity associated with each species' range, we retained two pPCA axes accounting for  
151 76% of variation in hydrology (Table S2) and three pPCA axes accounting for 81% of variation in  
152 climate (Table S3).

153

#### 154 *Quantifying competition and predation*

155 Quantifying the actual biotic interactions for a large number of species distributed across the vast  
156 geographic scale included in this study is virtually impossible. Hence, we developed two simple,  
157 objectively quantifiable metrics to approximate levels of competition and predation. We assumed  
158 that competitive interactions for the focal species primarily occur with other species of the family  
159 Poeciliidae (Alberici da Barbiano et al. 2010; Torres-Dowdall et al. 2013) and that the intensity of  
160 competition is a function of the number of coexisting species. Hence, we first analyzed overlap of  
161 distributional ranges to characterize patterns of sympatry (defined as range overlap values greater  
162 than zero; Weber et al. 2016). We created geo-referenced distributional range maps for each species  
163 by generating a convex hull around each species' known occurrence points (see above) using  
164 ArcMap. The resulting species-specific distributions were then intersected to determine the total  
165 number of competitor species exhibiting a range overlap with a focal species. Similarly, we created a  
166 metric estimating the levels of predation by determining the total number of piscivorous fish species  
167 exhibiting a range overlap with each focal species. To do so, we obtained 271,148 locality points  
168 (<http://gbif.org/>) of 7,170 species across 1,602 genera and 26 families in the superclass  
169 Osteichthyes that coincide with the distribution of poeciliids. Since distributional polygons of some



170 focal species overlapped with marine habitats (particularly in poeciliid species occurring along the  
171 Gulf of Mexico and in both island and mainland localities), we first removed species primarily  
172 inhabiting marine environments as well as non-native species, retaining 5,019 native freshwater  
173 species in 853 genera (Table S4). To identify potential predators, we conducted a genus-level  
174 literature search of dietary habits using relevant monographs (Greenfield and Thomerson 1997;  
175 Bussing 1998; Boschung et al. 2004; Miller et al. 2005; van der Sleen and Albert 2017), supplemented  
176 by the primary literature when necessary. We retained 131 genera that included species with evidence  
177 for piscivory (867 species; 73,421 locality points). Values for the number of competitors and  
178 predators were square-root-transformed prior to analyses.

179

#### 180 *Analytical framework*

181 We investigated hypotheses about the hierarchical relationships among abiotic and biotic  
182 environmental factors and matrotrophy using phylogenetic path analysis as implemented in the R  
183 package PHYLOPATH (van der Bijl 2018). We developed 18 models based on *a priori* hypotheses  
184 about the effects of hydrology, climate, NPP, competition, predation, and interactions between  
185 predictor variables relevant in the context of the locomotor cost and resource limitation hypotheses  
186 of matrotrophy evolution (Figure S2). As with other phylogenetic analyses described above, path  
187 analyses were run across 250 random trees. PHYLOPATH implements model selection with covariance  
188 inflation criterion,  $CIC_c$  (Rodriguez 2005). Models with an average  $\Delta CIC_c < 2$  were considered  
189 equally supported (Burnham and Anderson 2002). Joint effects of net primary productivity and  
190 competition were visualized using non-parametric thin-plate spline regression to create a surface of  
191 matrotrophy variation (Arnold 2003). Estimation of matrotrophy surfaces was performed using the  
192 FIELDS package in R, with smoothing parameter  $\lambda = 0.005$  (Nychka et al. 2007).

193

194 **Results**

195 *Evolutionary dynamics of matrotrophy evolution during diversification of poeciliid fishes*

196 Ancestral state reconstructions (ASR) were used to compare inferred ancestral states of matrotrophy  
197 to variation in matrotrophy observed in extant taxa (Figure 1A). ASRs across 250 trees  
198 demonstrated that lecithotrophy is not the ancestral provisioning strategy (Figure 1B). The inferred  
199 ancestral state was clearly toward the matrotrophic end of the spectrum (with a net weight gain  
200 during development) and distinctly above the levels of post-fertilization provisioning observed in  
201 most extant taxa (Figure 1B). This does not mean that matrotrophy evolved prior to lecithotrophy,  
202 but rather that the common ancestor of extant poeciliids had already evolved some degree of post-  
203 fertilization provisioning. Examining the direction of shifts in post-fertilization provisioning  
204 strategies between all nodes and their descendants revealed that reductions of post-fertilization  
205 provisioning were just as common as increases in matrotrophy (Figure 1C).

206

207 *Ecological correlates of matrotrophy evolution*

208 We contrasted a series of hypotheses about the hierarchical relationships among different abiotic  
209 and biotic environmental variables and matrotrophy using phylogenetic path analysis. Model  
210 selection identified two models with average  $\Delta\text{CIC}_c < 2$  across the 250 trees (Figure S3), including  
211 NPP, competition, and predation as predictor variables for variation in MI (Figure 2A). Both models  
212 indicated that NPP positively correlated with competition ( $r = 0.325$ , 95% CI = 0.324 – 0.326 for  
213 both supported models), which in turn was negatively correlated with matrotrophy (top model:  $r = -$   
214 0.030, 95% CI = -0.034 – -0.025; secondary model:  $r = -0.077$ , 95% CI = -0.081 – -0.075). In  
215 addition, there was a positive relationship between NPP and matrotrophy (top model:  $r = 0.024$ ,  
216 95% CI = 0.022 – 0.025; secondary model:  $r = 0.023$ , 95% CI = 0.021 – 0.024). Simultaneously  
217 visualizing the effects of NPP and competition on matrotrophy indicated that high levels of

218 matrotrophy occurred when NPP was high and competition was low (Figure 2B). In the best  
219 supported model, NPP was also positively correlated with predation ( $r = 0.184$ , 95% CI = 0.183 –  
220 0.185), which in turn was negatively correlated with matrotrophy ( $r = -0.082$ , 95% CI = -0.087 –  
221 0.078). Notably, however, the directionality of the relationship between predation and matrotrophy  
222 was opposite to the predictions of the locomotor cost hypothesis, which posits that matrotrophy  
223 should enhance locomotor performance and be favored in high-predation environments. Although  
224 the effects sizes in the path analyses were relatively small, they were significantly different from zero,  
225 indicating that ecology has played a role in matrotrophy evolution.

226

## 227 **Discussion**

228 Shifts from pre- to post-fertilization maternal provisioning represent a major axis of life history  
229 evolution in viviparous organisms (Wourms 1981; Blackburn 1992). Even though life history  
230 evolution is generally assumed to progress from oviparity to lecithotrophic viviparity to  
231 matrotrophic viviparity (e.g., Furness et al. 2015), our analyses indicated that decreases in levels of  
232 matrotrophy were just as common as increases. Such bi-directional evolution along the  
233 lecithotrophy-matrotrophy continuum has been documented in other viviparous taxa (e.g., Dulvy  
234 and Reynolds 1997; Reznick et al. 2007) and parallels secondary losses of obligate viviparity in fishes  
235 and reptiles (Parenti et al. 2010; Recknagel et al. 2018). The standard model of linear life history  
236 evolution therefore needs reevaluation to acknowledge that the evolution of these traits is more  
237 complex and dynamic than generally appreciated.

238 Our analyses further suggested that ecological sources of selection are important in driving  
239 bi-directional evolution along the lecithotrophy-matrotrophy continuum. Phylogenetic path analysis  
240 identified three biotic variables that were associated with variation in matrotrophy (resource  
241 availability, competition, and predation), all of which are well-documented drivers of life history

242 diversification in animals (Stearns 1976; Martin 1995; Wilson 2014). However, the relationship  
243 between matrotrophy and predation was opposite to the predictions of the locomotor hypothesis,  
244 even though microevolutionary analyses have indicated that matrotrophy can be favored in high  
245 predation environments requiring efficient escape responses (Gorini-Pacheco et al. 2017; Hagmayer  
246 et al. 2020). Instead, our results provided support for the resource availability hypothesis,  
247 demonstrating that high levels of matrotrophy coincided with low competition and high resource  
248 availability. This finding is consistent with the predictions of theoretical models, which predict  
249 increases in matrotrophy in environments with abundant and stable resources (Trexler and  
250 DeAngelis 2003), and empirical observations (Pollux and Reznick 2011). In addition, experimental  
251 studies have shown that maternal provisioning strategies in poeciliids respond to resource availability  
252 and female body condition (Trexler 1997; Marsh-Matthews and Deaton 2006; Hagmayer et al. 2018).

253         Our results largely align with previous theoretical and empirical studies; however, there are  
254 some caveats that warrant additional consideration. Most importantly, it remains to be tested  
255 whether metrics of resource availability, competition, and predation used here to facilitate  
256 continental-scale analyses accurately reflect selective regimes experienced by different species. The  
257 challenges of quantifying complex variation in biotic interactions across the vast spatial and  
258 phylogenetic scales covered in this study highlights the need for microevolutionary analyses and  
259 experimental approaches with a broader taxon sampling that allow for a better understanding of  
260 causal relationships (Culumber and Tobler 2018). For example, while there is experimental evidence  
261 for the fitness costs of matrotrophy under fluctuating resource conditions (Pollux and Reznick  
262 2011), we still lack any empirical evidence indicating that matrotrophy provides fitness benefits over  
263 lecithotrophy under high and stable resource conditions (Pollux et al. 2009). In addition, it remains  
264 to be experimentally tested how resource availability and competition potentially interact in  
265 determining the success of different maternal provisioning strategies, especially because resource

266 stress and competitive interactions may have non-additive effects (Hart and Marshall 2013; van  
267 Egmond et al. 2018).

268

## 269 **Conclusions**

270 The role of ecological sources of selection as key drivers in life history evolution is well established  
271 at microevolutionary scales (Partridge and Harvey 1988; Reznick et al. 1990). Our study revealed that  
272 ecology also correlates with maternal provisioning strategies at macroevolutionary scales, suggesting  
273 that adaptation to resource availability and competition could explain life history diversification in  
274 livebearing fishes and potentially in other viviparous taxa (Wourms 1981; Blackburn 1992). Our  
275 findings do not exclude the possibility that other evolutionary forces are also at play. For example,  
276 variation in maternal provisioning strategies has been associated with parent-offspring conflict  
277 (Schrader and Travis 2008; Ala-Honkola et al. 2011; Pollux et al. 2014), potentially leading to  
278 antagonistic coevolution between maternal and embryonic traits that impact nutrient transfer during  
279 pregnancy (Crespi and Semeniuk 2004; Furness et al. 2015). Further studies will consequently need  
280 to explore how ecological sources of selection might interact with parent-offspring conflict to shape  
281 the evolution of matrotrophy. Disentangling the drivers of matrotrophy evolution will be particularly  
282 interesting because changes in female provisioning strategies can potentiate (or impede) sexual  
283 selection and speciation (Zeh and Zeh 2000; Zeh and Zeh 2008) and explain broad-scale patterns of  
284 diversification in viviparous taxa (Furness et al. 2019).

285

## 286 **Data Accessibility**

287 Data used to conduct this study will be archived on Dryad upon acceptance of the manuscript.

288

## 289 **Acknowledgments**

290 This research was supported by the National Science Foundation (IOS-1557860 to MT). We thank  
291 members of the K-State Evolution Journal Club for constructive feedback on the manuscript.

292

## 293 **References**

294 Ala-Honkola, O., E. Friman, and K. Lindström. 2011. Costs and benefits of polyandry in a placental  
295 poeciliid fish *Heterandria formosa* are in accordance with the parent–offspring conflict theory of  
296 placentation. *Journal of Evolutionary Biology* 24:2600-2610.

297 Alberici da Barbiano, L., J. Waller, and C. Gabor. 2010. Differences in competitive efficiency  
298 between a sexual parasite and its host provide insight into the maintenance of a sperm-  
299 dependent vertebrate species. *Journal of Freshwater Ecology* 25:523-530.

300 Arnold, S. J. 2003. Performance surfaces and adaptive landscapes. *Integrative and Comparative*  
301 *Biology* 43:367-375.

302 Blackburn, D. G. 1992. Convergent evolution of viviparity, matrotrophy, and specializations for fetal  
303 nutrition in reptiles and other vertebrates. *American Zoologist* 32:313-321.

304 Boschung, H. T., R. L. Mayden, and J. R. Tomelleri. 2004. *Fishes of Alabama*. Smithsonian Books,  
305 Washinton, D. C.

306 Burnham, K. P. and D. R. Anderson. 2002. *Model selection and multimodel inference: a practical*  
307 *information-theoretic approach*. Springer, New York, NY.

308 Bussing, W. A. 1998. *Peces de las Aguas Continentales de Costa Rica - Freshwater Fishes of Costa*  
309 *Rica*. Editorial de la Universidad de Costa Rica, San José.

310 Campiglia, S. S. and M. H. Walker. 1995. Developing embryo and cyclic changes in the uterus of  
311 *Peripatus (Macroperipatus) acacioi* (Onychophora, Peripatidae). *Journal of Morphology* 224:179-  
312 198.

- 313 Coleman, S. W., A. Harlin-Cognato, and A. G. Jones. 2009. Reproductive isolation, reproductive  
314 mode, and sexual selection: empirical tests of the viviparity-driven conflict hypothesis.  
315 *American Naturalist* 173:291-303.
- 316 Crespi, B. and C. Semeniuk. 2004. Parent-offspring conflict in the evolution of vertebrate  
317 reproductive mode. *American Naturalist* 163:635-653.
- 318 Culumber, Z. W. and M. Tobler. 2017. Sex-specific evolution during the diversification of live-  
319 bearing fishes. *Nature Ecology & Evolution* 1:1185-1191.
- 320 Culumber, Z. W. and M. Tobler. 2018. Correlated evolution of thermal niches and functional  
321 physiology in tropical freshwater fishes. *Journal of Evolutionary Biology* 31:722-734.
- 322 Dulvy, N. K. and J. D. Reynolds. 1997. Evolutionary transitions among egg-laying, live-bearing and  
323 maternal inputs in sharks and rays. *Proceedings of the Royal Society B* 264:1309-1315.
- 324 Evans, J. P., A. Pilastro, and I. Schlupp, eds. 2011. *Ecology and Evolution of Poeciliid Fishes*. The  
325 University of Chicago Press, Chicago, IL.
- 326 Fleuren, M., E. M. Quicazan-Rubio, J. L. van Leeuwen, and B. J. A. Pollux. 2018. Why do placentas  
327 evolve? Evidence for a morphological advantage during pregnancy in live-bearing fish. *PLoS*  
328 *ONE* 13:e0195976.
- 329 Furness, A. I., K. R. Morrison, T. J. Orr, J. D. Arendt, and D. N. Reznick. 2015. Reproductive mode  
330 and the shifting arenas of evolutionary conflict. *Annals of the New York Academy of*  
331 *Sciences* 1360:75-100.
- 332 Furness, A. I., B. J. A. Pollux, R. W. Meredith, M. S. Springer, and D. N. Reznick. 2019. How  
333 conflict shapes the evolution in poeciliid fishes. *Nature Communications* 10:3335.
- 334 Ghalambor, C. K., D. N. Reznick, and J. A. Walker. 2004. Constraints on adaptive evolution: the  
335 functional trade-off between reproduction and fast-start swimming performance in the  
336 Trinidadian guppy (*Poecilia reticulata*). *American Naturalist* 164:38-50.

- 337 Gorini-Pacheco, B., E. Zandonà, and R. Mazzoni. 2017. Predation effects on matrotrophy,  
338 superfetation and other life history traits in *Phalloceros barpagos*. Ecology of Freshwater Fish  
339 27:442-452.
- 340 Greenfield, D. W. and J. E. Thomerson. 1997. Fishes of the continental waters of Belize. The  
341 University Press of Florida, Gainesville.
- 342 Hagmayer, A., A. I. Furness, D. N. Reznick, M. L. Dekker, and B. J. A. Pollux. 2020. Predation risk  
343 shapes the degree of placentation in natural populations of live-bearing fish. Ecology Letters  
344 23:831-840.
- 345 Hagmayer, A., A. I. Furness, D. N. Reznick, and B. J. A. Pollux. 2018. Maternal size and body  
346 condition predict the amount of post-fertilization maternal provisioning in matrotrophic  
347 fish. Ecology and Evolution 8:12386-12396.
- 348 Hart, M. W., M. Byrne, and M. J. Smith. 1997. Molecular phylogenetic analysis of life-history  
349 evolution in asterinid starfish. Evolution 51:1848-1861.
- 350 Hart, S. P. and D. J. Marshall. 2013. Environmental stress, facilitation, competition, and coexistence.  
351 Ecology 94:2719-2731.
- 352 Ho, A. F. L. C., C. L. Pruet, and J. Lin. 2016. Phylogeny and biogeography of *Poecilia*  
353 (Cypinodontiformes: Poeciliinae) across Central and South America based on mitochondrial  
354 and nuclear DNA markers. Molecular Phylogenetics and Evolution 101:32-45.
- 355 Hrbek, T., J. Seckinger, and A. Meyer. 2007. A phylogenetic and biogeographic perspective on the  
356 evolution of poeciliid fishes. Molecular Phylogenetics and Evolution 43:986-998.
- 357 Korneva, Z. V. 2005. Placental type interactions and evolutionary trends of development of uterus in  
358 cestodes. Journal of Evolutionary Biochemistry and Physiology 41:552-560.



- 359 Korniusshin, A. V. and M. Glaubrecht. 2003. Novel reproductive modes in freshwater clams:  
360 brooding and larval morphology in southeast Asian taxa of *Corbicula* (Mollusca, Bivalvia,  
361 Corbiculidae). *Acta Zoologica* 84:293-315.
- 362 Magnhagen, C. 1991. Predation risk as a cost of reproduction. *Trends in Ecology and Evolution*  
363 6:183-185.
- 364 Marsh-Matthews, E. and R. Deaton. 2006. Resources and offspring provisioning: A test of the  
365 Trexler-DeAngelis model for matrotrophy evolution. *Ecology* 87:3014-3020.
- 366 Martin, T. E. 1995. Avian life history evolution in relation to nest sites, nest predation, and food.  
367 *Ecological Monographs* 65:101-127.
- 368 Mateos, M., O. I. Sanjurjo, and R. C. Vrijenhoek. 2002. Historical biogeography of the livebearing fish  
369 genus *Poeciliopsis* (Poeciliidae: Cyprinodontiformes). *Evolution* 56:972-984.
- 370 Meffe, G. K. and F. F. Snelson. 1989. An ecological overview of poeciliid fishes. Pp. 13-31 in G. K.  
371 Meffe, and F. F. Snelson, eds. *Ecology and evolution of livebearing fishes (Poeciliidae)*.  
372 Prentice Hall, New Jersey.
- 373 Miles, D. B., B. Sinervo, and W. A. Frankino. 2000. Reproductive burden, locomotor performance,  
374 and the cost of reproduction in free ranging lizards. *Evolution* 54:1386-1395.
- 375 Miller, R. R. 1975. Five new species of Mexican poeciliid fishes of the genera *Poecilia*, *Gambusia*, and  
376 *Poeciliopsis*. *Occasional Papers of the Museum of Zoology, University of Michigan* 672:1-44.
- 377 Miller, R. R., W. Minckley, and S. Norris. 2005. *Freshwater fishes of Mexico*. University of Chicago  
378 Press, Chicago.
- 379 Nychka, D., R. Furrer, J. Paige, and S. Sain. 2007. fields: tools for spatial data. R package version 9.6.
- 380 Olivera-Tlahuel, C., A. G. Ossip-Klein, H. S. Espinosa-Pérez, and J. J. Zúñiga-Vega. 2015. Have  
381 superfetation and matrotrophy facilitated the evolution of larger offspring in poeciliid fishes?  
382 *Biological Journal of the Linnean Society* 116:787-804.

- 383 Ostrovsky, A. N., S. Lidgard, D. P. Gordon, T. Schwaha, G. Genikhovich, and A. V. Ereskovsky.  
384 2016. Matrotrophy and placentation in invertebrates: a new paradigm. *Biological Reviews*  
385 91:673-711.
- 386 Parenti, L. R., F. L. LoBostro, and H. Grier. 2010. Reproductive histology of *Tomeurus gracilis*  
387 Eigenmann, 1909 (Teleostei: Atherinomorpha: Poeciliidae) with comments on evolution of  
388 viviparity in atherinomorph fishes. *Journal of Morphology* 27:1399-1406.
- 389 Partridge, L. and P. H. Harvey. 1988. The ecological context of life history evolution. *Science*  
390 241:1449-1455.
- 391 Pires, M. N., A. I. Banet, B. J. A. Pollux, and D. N. Reznick. 2011. Variation and evolution of  
392 reproductive strategies. Pp. 28-37 in J. P. Evans, A. Pilastro, and I. Schlupp, eds. *Ecology*  
393 *and Evolution of Poeciliid Fishes*. University of Chicago Press, Chicago, IL.
- 394 Plaut, I. 2002. Does pregnancy affect swimming performance in female mosquitofish, *Gambusia*  
395 *affinis*? *Functional Ecology* 16:290-295.
- 396 Pollux, B., M. Pires, A. Banet, and D. Reznick. 2009. Evolution of placentas in the fish family  
397 Poeciliidae: an empirical study of macroevolution. *Annual Review of Ecology Evolution and*  
398 *Systematics* 40:271-289.
- 399 Pollux, B. J. A., R. W. Meredith, M. S. Springer, T. Garland, and D. N. Reznick. 2014. The evolution  
400 of the placenta drives a shift in sexual selection in livebearing fish. *Nature* 513:233-236.
- 401 Pollux, B. J. A. and D. N. Reznick. 2011. Matrotrophy limits a female's ability to adaptively adjust  
402 offspring size and fecundity in fluctuating environments. *Functional Ecology* 25:747-756.
- 403 Quicazan-Rubio, E. M., C. L. van Leeuwen, K. van Manen, M. Fleuren, B. J. A. Pollux, and E. J.  
404 Stamhuis. 2019. Coasting in live-bearing fish: the drag penalty of being pregnant. *Journal of*  
405 *the Royal Society Interface* 16:20180714.

- 406 Recknagel, H., N. A. Kamenos, and K. R. Elmer. 2018. Common lizards break Dollo's law of  
407 irreversibility: genome-wide phylogenomics support a single origin of viviparity and re-  
408 evolution of oviparity. *Molecular Phylogenetics and Evolution* 127:579-588.
- 409 Revell, L. J. 2012. phytools: an R package for phylogenetic comparative biology (and other things).  
410 *Methods in Ecology and Evolution* 3:217-223.
- 411 Reznick, D., H. Bryga, and J. A. Endler. 1990. Experimentally induced life-history evolution in a  
412 natural population. *Nature* 346:357-359.
- 413 Reznick, D., M. Mateos, and M. Springer. 2002. Independent origins and rapid evolution of the  
414 placenta in the fish genus *Poeciliopsis*. *Science* 298:1018-1020.
- 415 Reznick, D., R. Meredith, and B. B. Collette. 2007. Independent evolution of complex life history  
416 adaptation in two families of fishes, live-bearing halfbeaks (Zenarchopteridae, Beloniformes)  
417 and Poeciliidae (Cyprinodontiformes). *Evolution* 61:2570-2583.
- 418 Reznick, D. N., A. I. Furness, R. W. Meredith, and M. S. Springer. 2017. The origin and  
419 biogeographic diversification of fishes in the family Poeciliidae. *PLoS ONE* 12:e0172546.
- 420 Rodriguez, C. C. 2005. The ABC of model selection: AIC, BIC, and the new CIC. *AIP Conference*  
421 *Proceedings* 803:80-87.
- 422 Santini, F., L. J. Harmon, G. Carnevale, and M. E. Alfaro. 2009. Did genome duplication drive the  
423 origin of teleosts? A comparative study of diversification in ray-finned fishes. *BMC*  
424 *Evolutionary Biology* 9:1.
- 425 Schrader, M. and J. Travis. 2008. Testing the viviparity-driven-conflict hypothesis: parent-offspring  
426 conflict and the evolution of reproductive isolation in a poeciliid fish. *American Naturalist*  
427 172:806-817.
- 428 Shaffer, L. R. and D. R. Formanowicz. 1996. A cost of viviparity and parental care in scorpions:  
429 reduced sprint speed and behavioral compensation. *Animal Behavior* 51:1017-1024.

- 430 Stamatakis, A. 2014. RAxML version 8: a tool for phylogenetic analysis and post-analysis of large  
431 phylogenies. *Bioinformatics* 30:1312-1313.
- 432 Stearns, S. C. 1976. Life-history tactics: a review of ideas. *Quarterly Review of Biology* 51:3-47.
- 433 Steward, J. R. and D. G. Blackburn. 1988. Reptilian placentation: structural diversity and  
434 terminology. *Copeia* 1988:839-852.
- 435 Thibault, R. E. and R. J. Schultz. 1978. Reproductive adaptations among viviparous fishes  
436 (Cyprinodontiformes: Poeciliidae). *Evolution* 32:320-333.
- 437 Torres-Dowdall, J., F. Dargent, C. A. Handelsman, I. W. Ramnarine, and C. K. Ghalambor. 2013.  
438 Ecological correlated of the distribution limites of two poeciliid species along a salinity  
439 gradient. *Biological Journal of the Linnean Society* 108:790-805.
- 440 Trexler, J. C. 1997. Resource availability and plasticity in offspring provisioning: Embryo  
441 nourishment in sailfin mollies. *Ecology* 78:1370-1381.
- 442 Trexler, J. C. and D. L. DeAngelis. 2003. Resource allocation in offspring provisioning: An  
443 evaluation of the conditions favoring the evolution of matrotrophy. *American Naturalist*  
444 162:574-585.
- 445 van der Bijl, W. 2018. phylopath: easy phylogenetic path analysis in R. *PeerJ* 6:e4718.
- 446 van der Sleen, P. and J. S. Albert, eds. 2017. Field guide to the fishes of the Amazon, Orinoco, and  
447 Guianas. Princeton University Press, Princeton.
- 448 van Egmond, E. M., P. M. van Bodegom, J. R. van Hal, P. S. P. van Logtestijn, M. P. Berg, and R.  
449 Aerts. 2018. Nonadditive effects of consumption in an intertidal macroinvertebrate  
450 community are independent of food availability but driven by complementarity effects.  
451 *Ecology and Evolution* 8:3086-3097.
- 452 van Proosdij, A. S., M. S. Sosef, J. J. Wieringa, and N. Raes. 2015. Minimum required number of  
453 specimen records to develop accurate species distribution models. *Ecography*.

- 454 Wake, M. H. and R. Dickie. 1998. Oviduct structure and function and reproductive modes in  
455 amphibians. *Journal of Experimental Zoology* 282:477-506.
- 456 Weber, M. G., L. Mitko, T. Eltz, and S. R. Ramírez. 2016. Macroevolution of perfume signalling in  
457 orchid bees. *Ecology Letters* 19:1314-1323.
- 458 Wildman, D. E., C. Chen, O. Erez, L. I. Grossman, M. Goodman, and R. Romero. 2006. Evolution  
459 of the mammalian placenta revealed by phylogenetic analysis. *Proceedings of the National*  
460 *Academy of Sciences USA* 103:3203-3208.
- 461 Wilson, A. J. 2014. Competition as a source of constraint on life history evolution in natural  
462 populations. *Heredity* 112:70-78.
- 463 Wooding, P. and G. Burton. 2008. Comparative placentation: structures, functions and evolution.  
464 Springer-Verlag, Berlin.
- 465 Wourms, J. P. 1981. Viviparity: the maternal-fetal relationship in fishes. *American Zoologist* 21:473-  
466 515.
- 467 Wourms, J. P., B. D. Grove, and J. L. Lombardi. 1988. The maternal-fetal relationship in viviparous  
468 fishes. Pp. 2-134 *in* W. S. Hoar, ed. *Fish Physiology*. Academic Press, London.
- 469 Zeh, D. W. and J. A. Zeh. 2000. Reproductive mode and speciation: the viviparity-driven conflict  
470 hypothesis. *Bioessays* 22:938-946.
- 471 Zeh, J. A. and D. W. Zeh. 2008. Viviparity-driven conflict. *Annals of the New York Academy of*  
472 *Sciences* 1133:126-148.
- 473

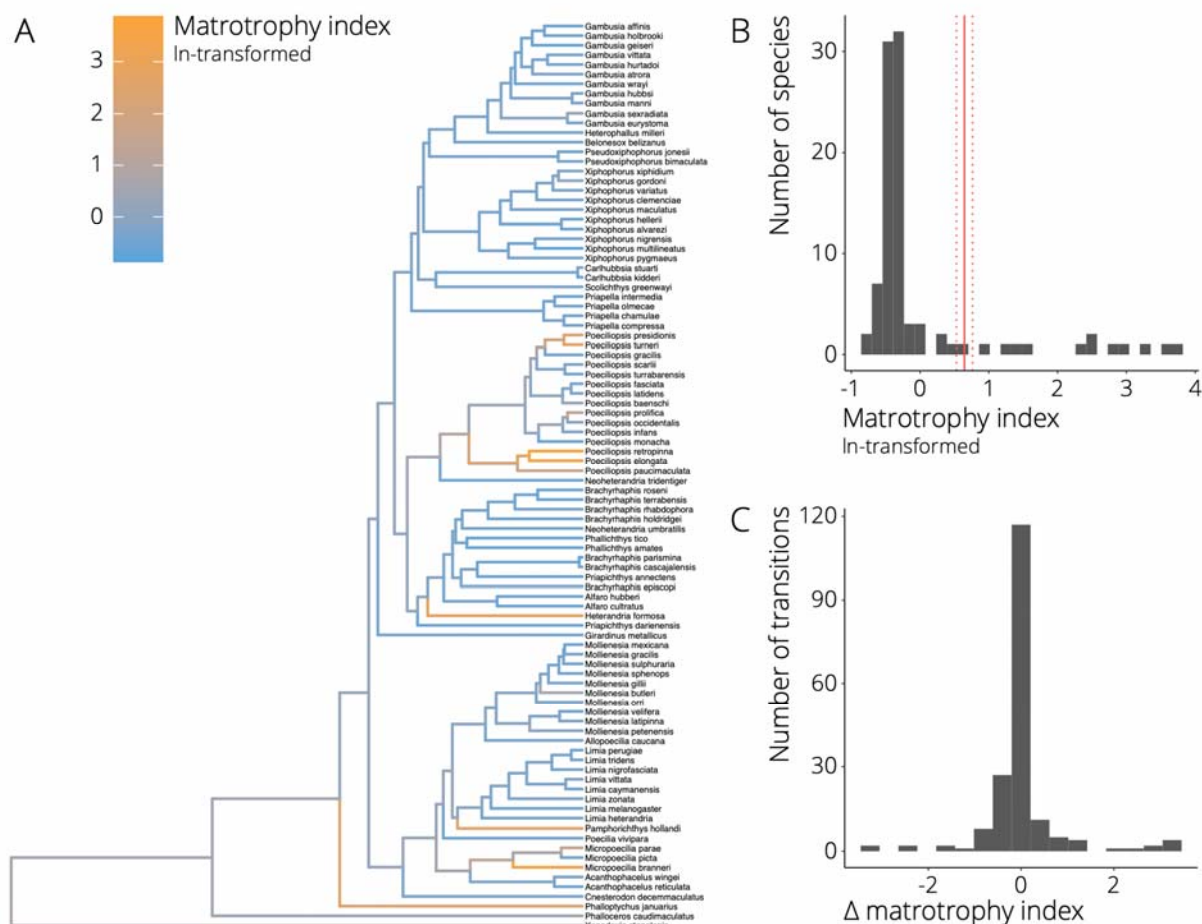

474

475 Figure 1. A. Best-scoring maximum likelihood tree of 94 species in the family Poeciliidae. The

476 ancestral state reconstruction of matrotrophy is mapped onto the phylogeny, with blue colors

477 depicting lecithotrophy and orange colors matrotrophy (as indicated by the color scale of ln-

478 transformed matrotrophy index values). B. Frequency histogram of the distribution of matrotrophy

479 index values in extant poeciliid species. The solid red line represents the average ancestral state

480 reconstruction for the matrotrophy index across 250 random trees with dotted lines indicating the

481 95% confidence interval for the estimate. C. Frequency histogram depicting the relative change in

482 matrotrophy index between all nodes and their descendants.

483

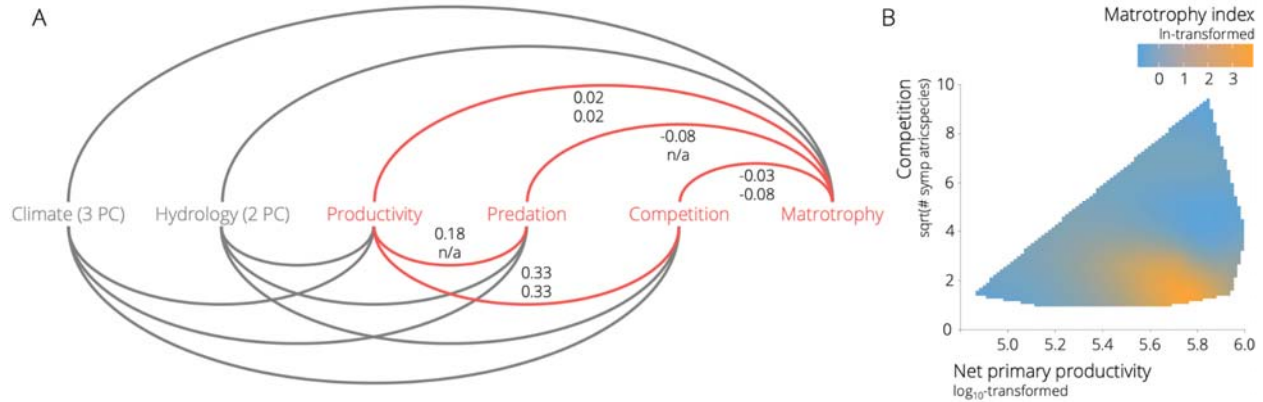

484

485 Figure 2. A. Representation of the full model used for phylogenetic path analysis (see Figure S2 for a  
486 comprehensive depiction of alternative models). Highlighted in red are variables and paths

487 associated with the top models exhibiting  $\Delta\text{CIC}_c < 2$ . Numbers represent correlation coefficients ( $r$ )

488 between variables for the top model (top number) and the secondary model (bottom number). Note

489 that the factor predation was absent from the secondary model. B. Landscape of matrotrophy

490 variation as a function of net primary productivity and competition. Colors correspond to variation

491 in matrotrophy, with blue colors depicting maternal provisioning strategies toward the lecithotrophy

492 end of the spectrum and orange colors strategies toward the matrotrophy end (as indicated by the

493 color scale of ln-transformed matrotrophy index values).
